# Supplementary material
Source: PubMed Central journal article supplement (PMC3454882)
Supplement: supp_112.142018_142018SI.pdf [file supp_112.142018_142018SI.pdf]

## SUPPORTING MATERIAL

**File S1. Demographic simulation methods.** The following command lines were used to generate simulated data under demographic models. “msafe” refers to a version of ms (HUDSON 2002) modified to implement founder events with multiply mated females (courtesy of R. Hudson) and instantaneous admixture, available from A. Kern. Pairs of command lines are given for (1) the simulations used for diversity ratio analyses, and (2) the simulations used for LD analyses. Command lines are given separately for X-linked and autosomal loci. “+admix” refers to a modified version of each published model that includes 10% African admixture into the U.S. sample 1250 generations ago. Arguments after the admixture flag (-eA) refer to the timing (in coalescent units), destination population for admixture, source population for admixture, and admixture proportion. Arguments after the founder event flag (-eF) refer to timing, population affected, inheritance (0 for autosomal, 1 for X-linked), multiple mating parameter (number of males that each female in the founder party had mated with), the number of founder events, and then a series of numbers indicating the number of females present in each of those founder events. Further details regarding the founder event model can be found in (POOL and NIELSEN 2008). Additional information about these simulations, including the assumptions needed to implement each model, is given in the Materials and Methods section.

Simulations using the model of (THORNTON and ANDOLFATTO 2006).

X:

```
./msafe 39 10000 -t 8.4 -r 57.6 1000 -I 2 32 7 0 -en 0.0042 1 0.029 -en 0.0192 1 1
-ej 0.0192000001 1 2 ./msafe 32 1000 -t 194 -r 1328 23040 -eN 0.0042 0.029 -eN
0.0192 1
```

A:

```
./msafe 38 10000 -t 8.4 -r 38.1 1000 -I 2 32 6 0 -en 0.00315 1 0.029 -en 0.0144 1 1
-ej 0.0144000001 1 2 ./msafe 32 1000 -t 194 -r 879 23040 -eN 0.00315 0.029 -eN
0.0144 1
```

X+admix:

```
./msafe 39 10000 -t 8.4 -r 57.6 1000 -I 2 32 7 0 -eA 0.00067 1 2 0.1 -en 0.0042 1
0.029 -en 0.0192 1 1 -ej 0.0192000001 1 2 ./msafe 32 1000 -t 194 -r 1328 23040 -I 2
32 0 0 -eA 0.00067 1 2 0.1 -en 0.0042 1 0.029 -en 0.0192 1 1 -ej 0.0192000001 1 2
```

A+admix:

```
./msafe 38 10000 -t 8.4 -r 38.1 1000 -I 2 32 6 0 -eA 0.0005 1 2 0.1 -en 0.00315 1
0.029 -en 0.0144 1 1 -ej 0.0144000001 1 2 ./msafe 32 1000 -t 194 -r 879 23040 -I 2
32 0 0 -eA 0.0005 1 2 0.1 -en 0.00315 1 0.029 -en 0.0144 1 1 -ej 0.0144000001 1 2
```

Simulations using the models of (LI and STEPHAN 2006) and (HUTTER *et al.* 2007).

X:

```
./msafe 39 10000 -t 37 -r 254 1000 -c 5 86.5 -I 2 32 7 0 -en 0 1 0.124 -en
0.0044912 1 0.000256 -en 0.00459 1 1 -ej 0.00459000001 1 2 -eN 0.0174 0.2 ./msafe
32 1000 -t 852 -r 5842 23040 -c 5 86.5 -eN 0 0.124 -eN 0.0044912 0.000256 -eN
0.00459 1 -eN 0.0174 0.2
```

A:

```
./msafe 38 10000 -t 37.6 -r 171 1000 -c 5 86.5 -I 2 32 6 0 -en 0 1 0.183 -en
0.0037281 1 0.000377 -en 0.00381 1 1 -ej 0.00381000001 1 2 -eN 0.0145 0.2 ./msafe
32 200 -t 866 -r 3933 23040 -c 5 86.5 -eN 0 0.183 -eN 0.0037281 0.000377 -eN
0.00381 1 -eN 0.0145 0.2
```

X+admix:

```
./msafe 39 10000 -t 37 -t 852 -r 5842 -c 5 86.5 -I 2 32 7 0 -en 0 1 0.124 -eA
0.0000363 1 2 0.1 -en 0.0044912 1 0.000256 -en 0.00459 1 1 -ej 0.00459000001 1 2
-eN 0.0174 0.2 ./msafe 32 1000 -t 1150 -r 7880 23040 -c 5 86.5 -I 2 32 0 0 -en 0 1
0.124 -eA 0.0000363 1 2 0.1 -en 0.0044912 1 0.000256 -en 0.00459 1 1 -ej
0.00459000001 1 2 -eN 0.0174 0.2
```

A+admix:

```
./msafe 38 10000 -t 60.2 -r 171 1000 -c 5 86.5 -I 2 32 6 0 -en 0 1 0.183 -eA
0.0000301 1 2 0.1 -en 0.0037281 1 0.000377 -en 0.00381 1 1 -ej 0.00381000001 1 2
-eN 0.0145 0.2 ./msafe 32 1000 -t 866 -r 3933 23040 -c 5 86.5 -I 2 32 0 0 -en 0 1
0.183 -eA 0.0000301 1 2 0.1 -en 0.0037281 1 0.000377 -en 0.00381 1 1 -ej
0.00381000001 1 2 -eN 0.0145 0.2
```

Simulations using a model from (POOL and NIELSEN 2008).

X:

```
./msafe 39 10000 -t 8.4 -r 57.6 1000 -c 5 86.5 -I 2 32 7 0 -en 0 1 0.746 -eF
0.00597 1 1 5 4 4 1 1 1 -ej 0.00597000001 1 2 ./msafe 32 1000 -t 194 -r 1328 23040
-c 5 86.5 -eN 0 0.746 -eF 0.00597 1 1 5 4 4 1 1 1 -eN 0.00597000001 1
```

A:

```
./msafe 38 10000 -t 8.4 -r 38.1 1000 -c 5 86.5 -I 2 32 6 0 -eF 0.005 1 0 5 4 4 1 1
1 -ej 0.00500000001 1 2 ./msafe 32 1000 -t 194 -r 879 23040 -c 5 86.5 -eF 0.005 1 0
5 4 4 1 1 1 -eN 0.005 1
```

X+admix:

```
./msafe 39 10000 -t 8.4 -r 57.6 1000 -c 5 86.5 -I 2 32 7 0 -en 0 1 0.746 -eA 0.0008
1 2 0.1 -eF 0.00597 1 1 5 4 4 1 1 1 -ej 0.00597000001 1 2 ./msafe 32 1000 -t 194 -r
1328 23040 -c 5 86.5 -I 2 32 0 0 -en 0 1 0.746 -eA 0.0008 1 2 0.1 -eF 0.00597 1 1 5
4 4 1 1 1 -ej 0.00597000001 1 2
```

A+admix:

```
./msafe 38 10000 -t 8.4 -r 38.1 1000 -c 5 86.5 -I 2 32 6 0 -eA 0.0005 1 2 0.1 -eF
0.005 1 0 5 4 4 1 1 1 -ej 0.00500000001 1 2 ./msafe 32 1000 -t 194 -r 879 23040 -c 5
86.5 -I 2 32 0 0 -eA 0.0005 1 2 0.1 -eF 0.005 1 0 5 4 4 1 1 1 -ej 0.00500000001 1 2
```

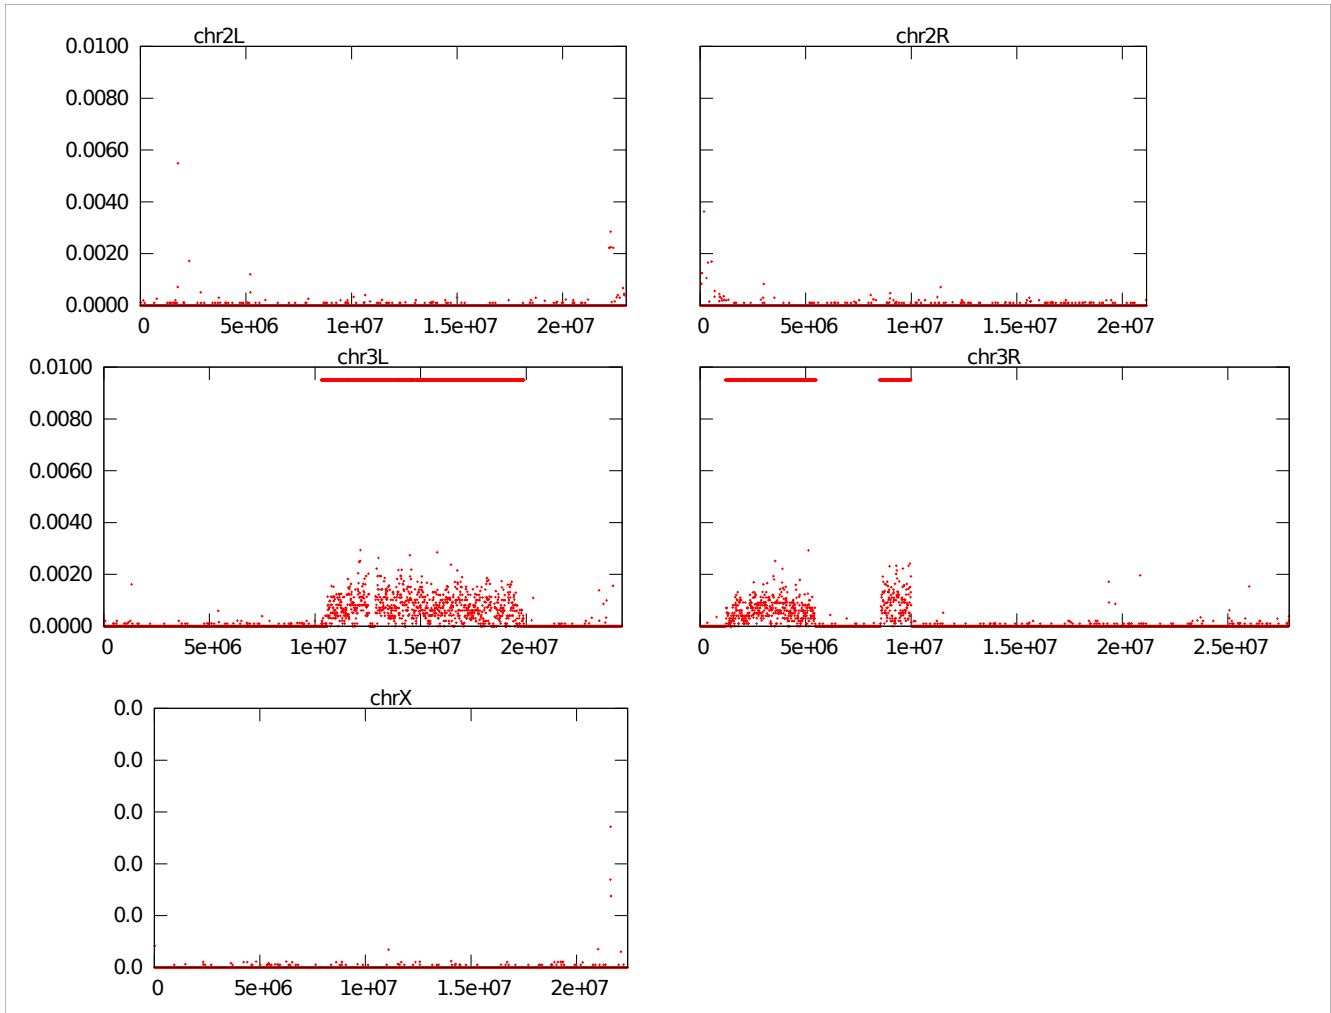

**Figure\_S1.** — Regions of residual heterozygosity in *RAL-335\_1*. The proportion of sites called as heterozygotes in the “diploid” assembly *RAL-335\_1* in 100 kbp windows plotted every 5 kbp on the major euchromatic chromosome arms. The bars of at the top indicate the segments designated as “residually heterozygous” and thus filtered from further analyses.

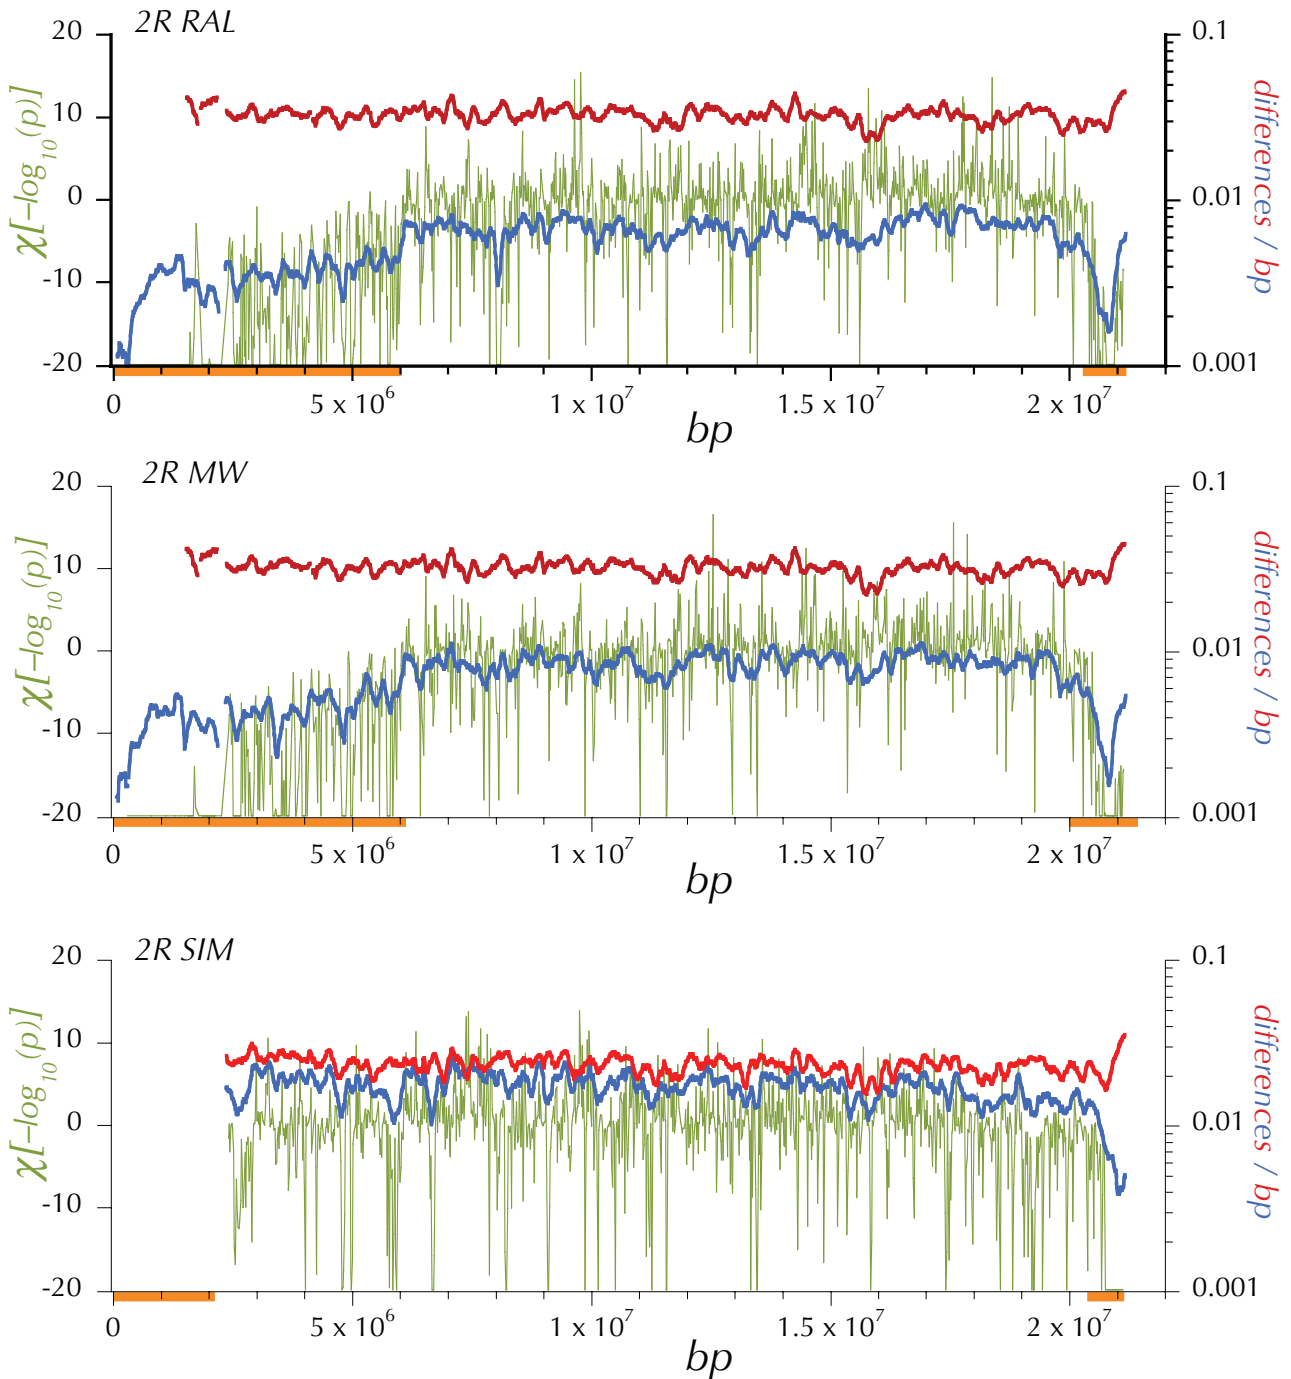

**Figure\_S2.** — Expected heterozygosity, divergence and *HKAI* on the chr2R for the North American (RAL), African (MW) and simlans (SIM) samples. The (blue) expected heterozygosity,  $\pi$  at the midpoint of 150 kbp windows (incremented every 10 kbp, minimum coverage = 0.25 and Q30 sequence). The (red) lineage specific, average Q30 divergence in 150 kbp windows (incremented every 10 kbp and minimum coverage of 0.25). A preliminary application of *HKAI* on the Q30 data in windows of 4096 contiguous polymorphic or divergent sites identified centromere- and telomere-proximal regions (orange bars) in which the each window exhibited a deficiency of polymorphic sites relative to the chromosome-arm average. Then *HKAI* was applied again on the Q30 data in windows of 512 contiguous polymorphic or divergent sites (excluding these centromere- and telomere-proximal regions from calculation of the chromosome-arm-wide expected proportions,  $p_c$  and  $d_c$ ). The (olive)  $\chi[\log(p_{HKAI})]$  is the log of the p-value associated with *HKAI* plotted with the sign of the difference between the observed number and the expected number of polymorphic sites in the window.

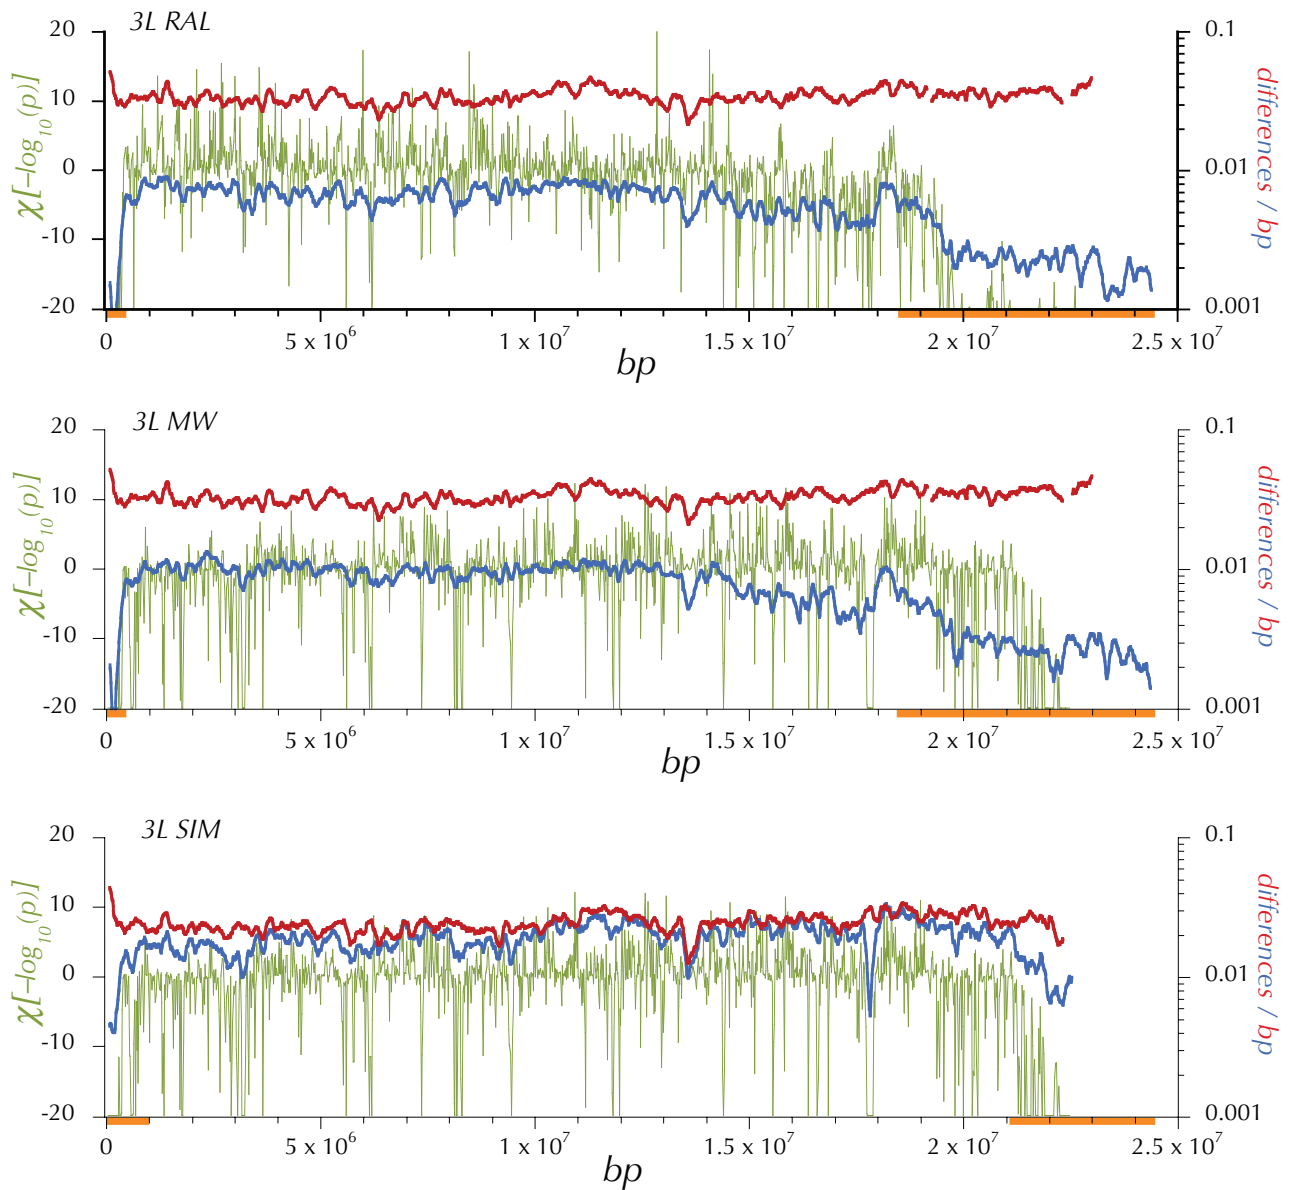

**Figure S3.** — Expected heterozygosity, divergence and *HKAI* on the chr3L for the North American (RAL), African (MW) and simlans (SIM) samples. The (blue) expected heterozygosity,  $\pi$  at the midpoint of 150 kbp windows (incremented every 10 kbp, minimum coverage = 0.25 and Q30 sequence). The (red) lineage specific, average Q30 divergence in 150 kbp windows (incremented every 10 kbp and minimum coverage of 0.25). A preliminary application of *HKAI* on the Q30 data in windows of 4096 contiguous polymorphic or divergent sites identified centromere- and telomere-proximal regions (orange bars) in which the each window exhibited a deficiency of polymorphic sites relative to the chromosome-arm average. Then *HKAI* was applied again on the Q30 data in windows of 512 contiguous polymorphic or divergent sites (excluding these centromere-and telomere-proximal regions from calculation of the chromosome-arm-wide expected proportions,  $p_c$  and  $d_c$ ). The (olive)  $\chi[\log(p_{HKAI})]$  is the log of the p-value associated with *HKAI* plotted with the sign of the difference between the observed number and the expected number of polymorphic sites in the window.

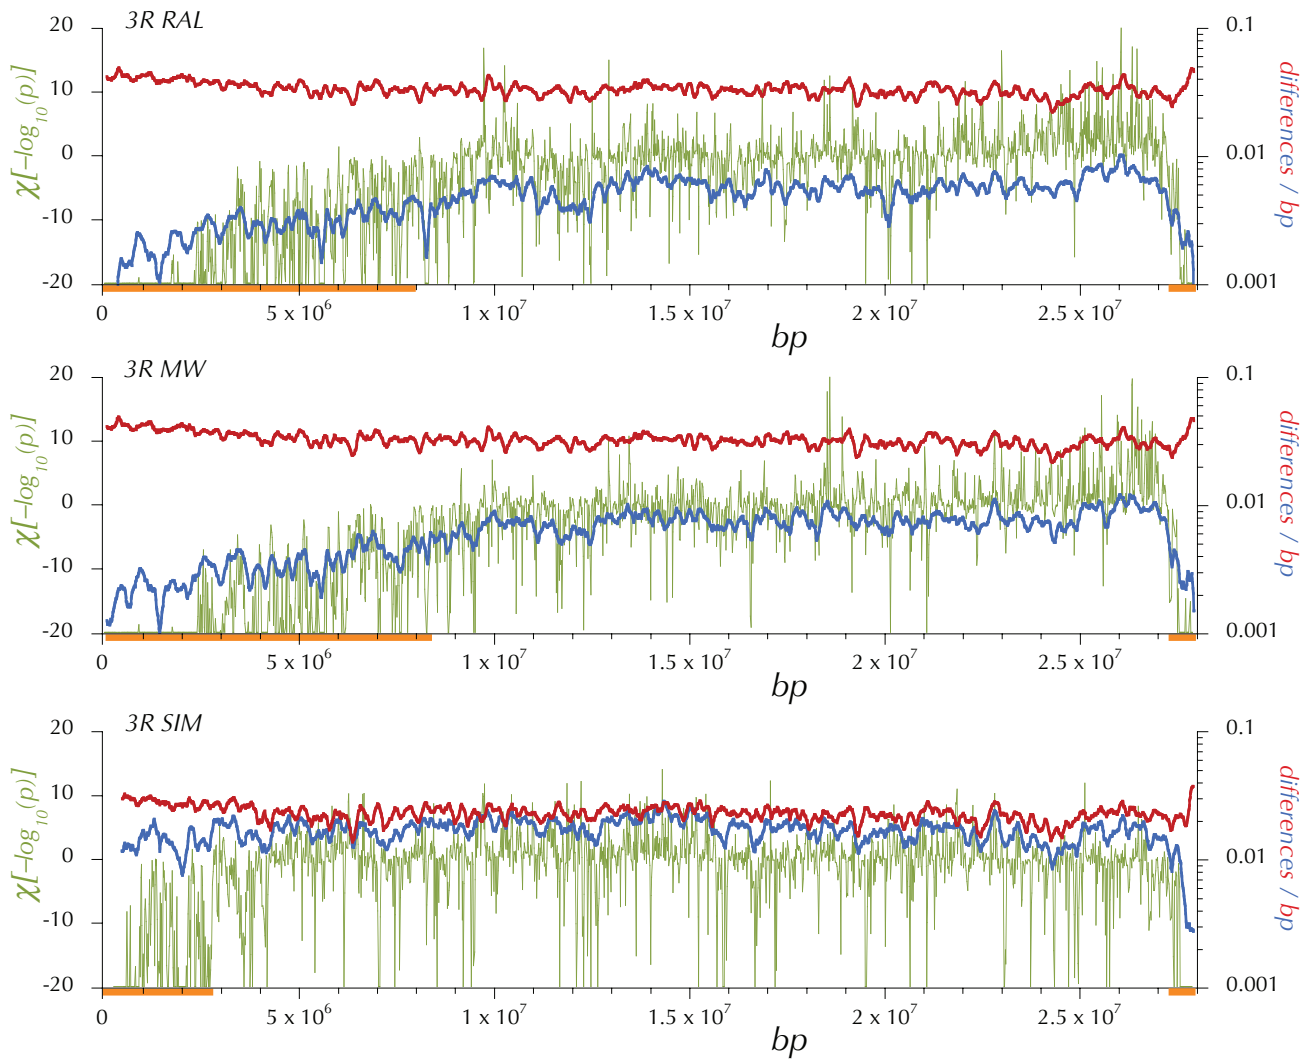

**Figure S4.** — Expected heterozygosity, divergence and *HKAI* on the chr3R for the North American (RAL), African (MW) and simulans (SIM) samples. The (blue) expected heterozygosity,  $\pi$  at the midpoint of 150 kbp windows (incremented every 10 kbp, minimum coverage = 0.25 and Q30 sequence). The (red) lineage specific, average Q30 divergence in 150 kbp windows (incremented every 10 kbp and minimum coverage of 0.25). A preliminary application of *HKAI* on the Q30 data in windows of 4096 contiguous polymorphic or divergent sites identified centromere- and telomere-proximal regions (orange bars) in which the each window exhibited a deficiency of polymorphic sites relative to the chromosome-arm arm average. Then *HKAI* was applied again on the Q30 data in windows of 512 contiguous polymorphic or divergent sites (excluding these centromere- and telomere-proximal regions from calculation of the chromosome-arm-wide expected proportions,  $p_c$  and  $d_c$ ). The (olive)  $\chi[\log(p_{HKAI})]$  is the log of the p-value associated with *HKAI* plotted with the sign of the difference between the observed number and the expected number of polymorphic sites in the window.

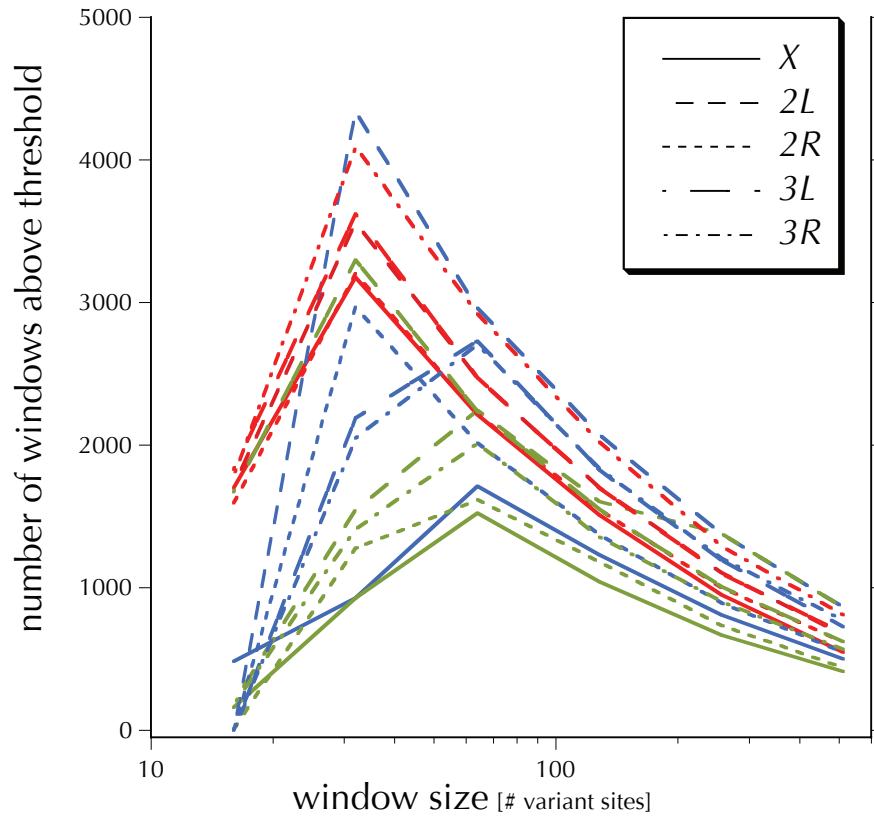

**Figure S5.** — False discovery rates for different *HKA1* window sizes, chromosome arm and samples of genomes. The numbers of windows,  $k$  with nominal p-values  $< k*0.05/n$ , (where  $n$  is the total number of windows on the chromosome arm) is plotted against window sizes: 16, 32, 64, 128, 256, and 512 bp for the African sample (MW, olive), North American (RAL, blue) and *simulans* (SIM, red). The different chromosome arms are plotted separately.

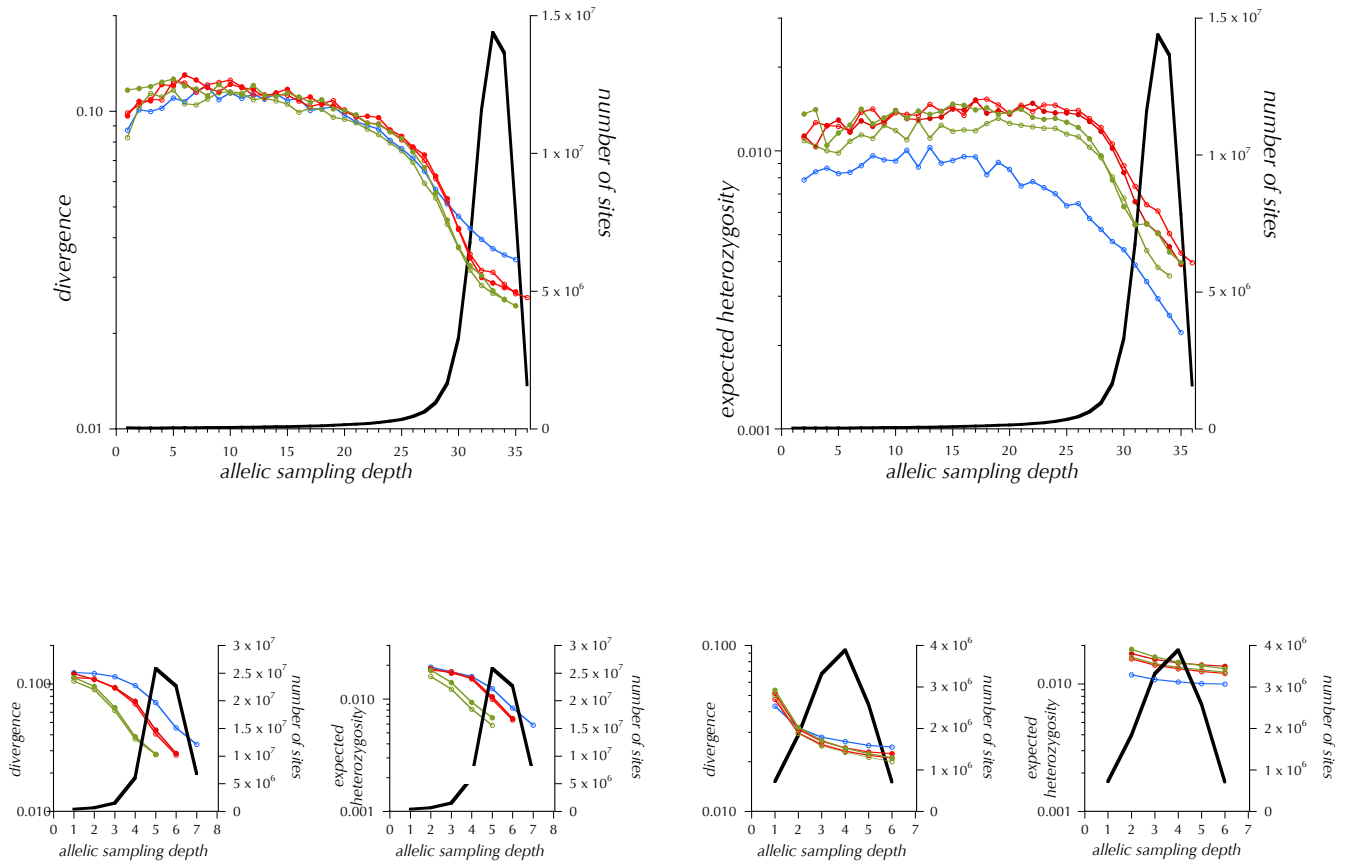

**Figure S6.** — The distributions of expected heterozygosity, divergence and number of sites at various (allele) sampling depths for Q30 data. Chromosome arms: X – blue, chr2 – red and chr3 – olive. Number of sites – black.



## Genomic Polymorphism and Divergence

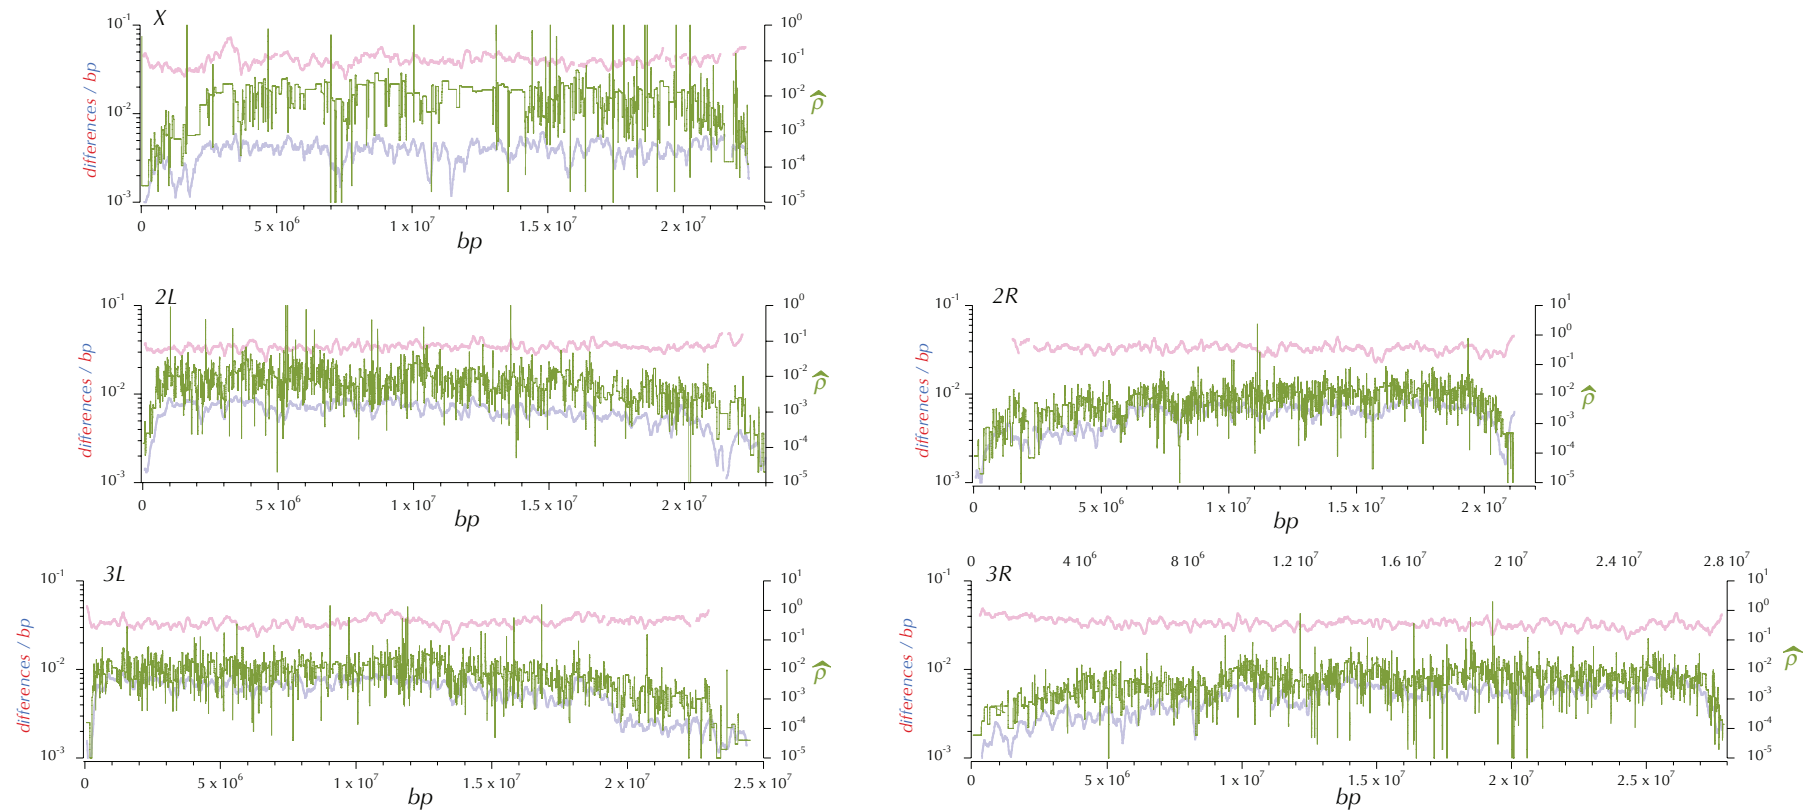

**Figure S7.** — The genomic distribution of  $\hat{\rho}$  (olive), an estimate of the population recombination parameter  $2Nr$  along with expected heterozygosity (blue,  $\pi_w$ ) and lineage specific divergence (red,  $\delta_w$ ).

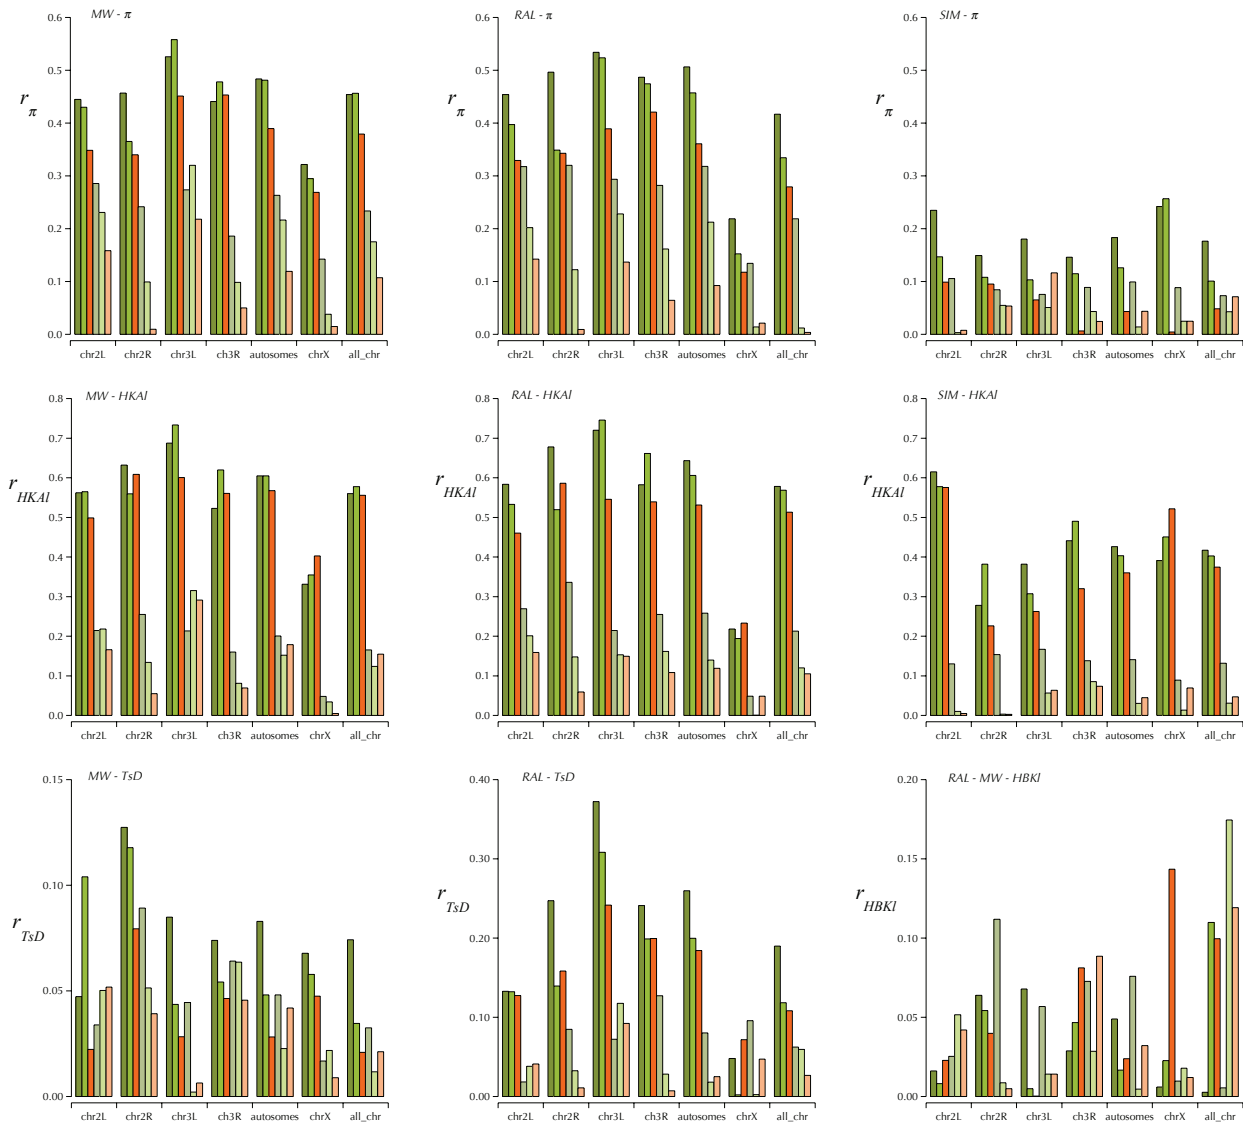

**Figure S8.** — Correlations between recombination rates and *HKAI*,  $\pi_w$  & *TsD*. *r* is the bp-weighted Pearson's correlation coefficient between *TsD*,  $\pi_w$  & *HKAI* and the logarithms of  $\hat{\rho}_0$  (olive),  $\hat{\rho}_{15}$  (light olive) and  $\hat{\rho}_{15}$  (orange) across the autosomes and X chromosome. The three lower columns to the right (lighter shades) are the corresponding correlations for the “trimmed” euchromatic regions.

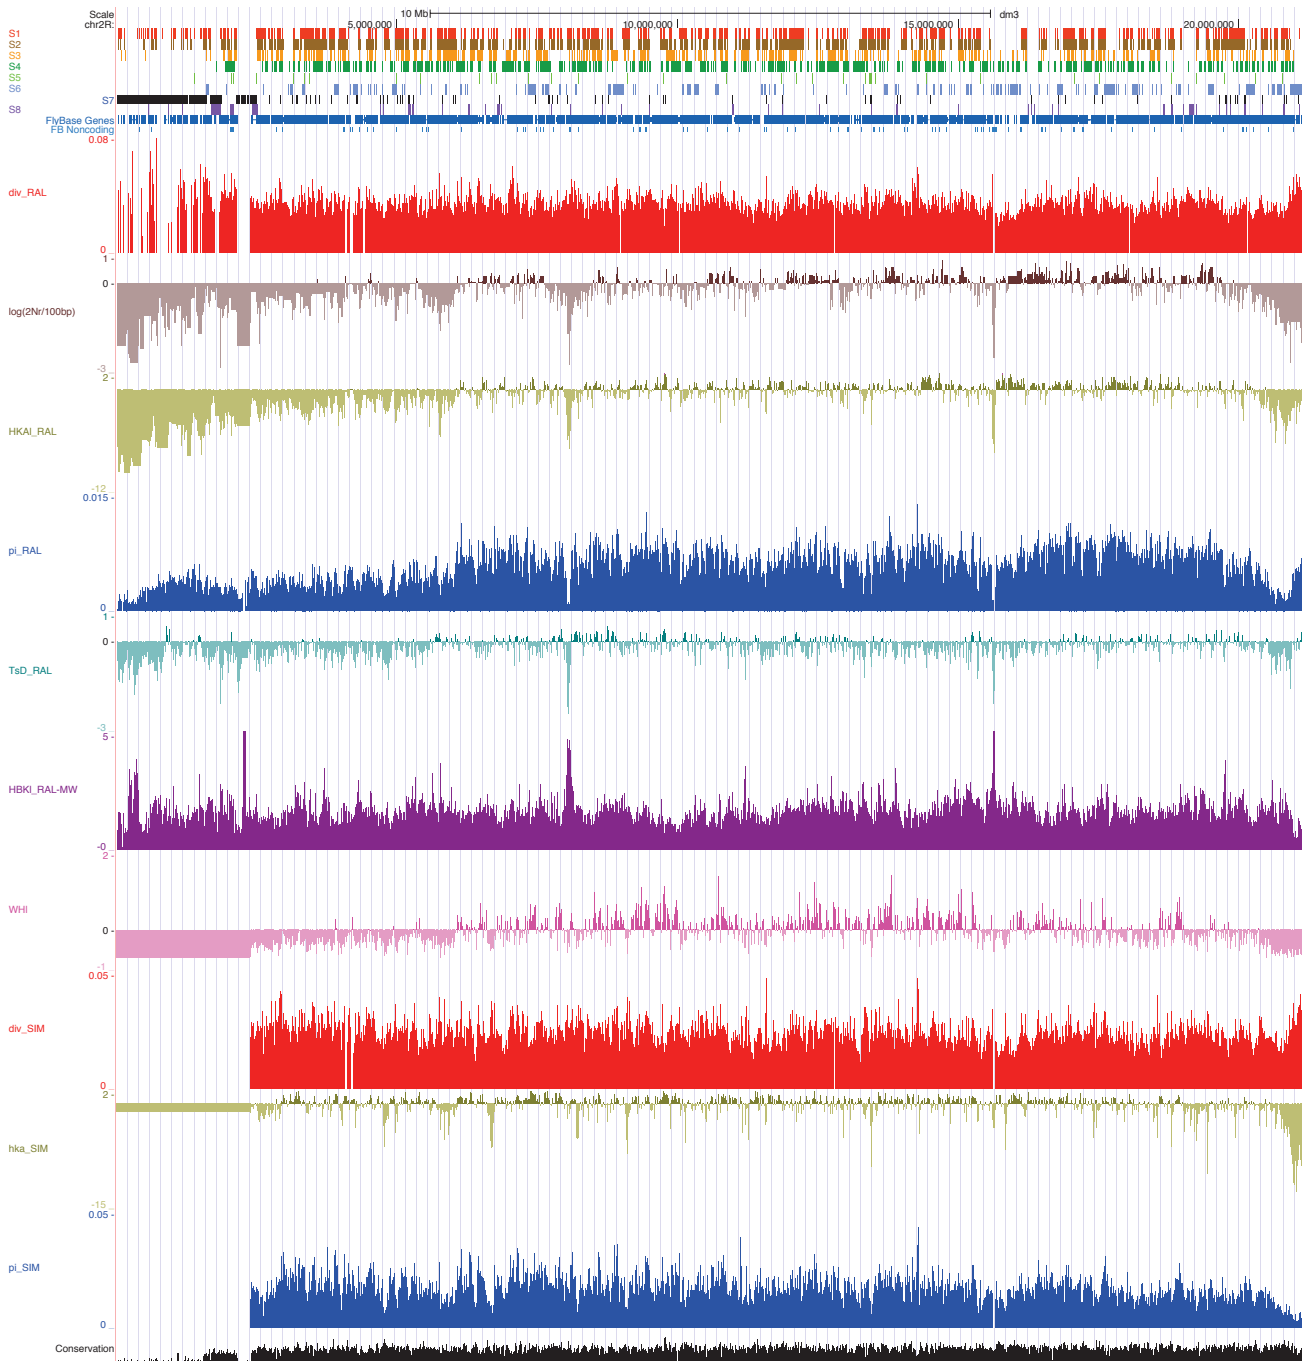

**Figure S9.** — Presentation in the UCSC Genome Browser of the distributions across chr2R of the population genomic statistics,  $\pi_w$ ,  $\delta_w$ ,  $\hat{\rho}$ , *HKAI* and *TsD* for the RAL sample as well as *HBKI*, and *WHI*. At the top are *chromatin states 1* through 8, followed by the Flybase annotated protein coding genes and then by noncoding genes. The eleventh track (down) begins the “custom” tracks from this study with  $\log(\hat{\rho}/100)$ . At the bottom are three standard UCSC Genome Browser annotation tracks, phylogenetic “Conservation,” “RepeatMasker” and “Simple Repeats.” Note the large reduction in  $\log(\hat{\rho}/100)$ , estimated  $2Nr$  in the centromere-proximal 6 Mbp and the distal, telomere-proximal 1 Mbp.  $\pi_w$  (but not  $\delta_w$  and thus), *HKAI*, *TsD* and *WHI* (not *HBKI*) all follow this pattern. In the intervening 14 Mbp of the euchromatic chr2R the patterns are on smaller scales. The region starting at 8 Mbp is an example local patterns that likely reflect the recent evolution of 31 genes in the cluster including strong geographic differentiation. This area is expanded in Figure S10. Access to these tracks over the entire genome of the MW, RAL and SIM samples is available through this [track data hub](#) containing these fine-scale statistics (this figure is obtained by expanding the view to the entire chromosome arm). Gap arise primarily for two reasons: a large repetitive region in the reference sequence(s) or gaps in the multispecies alignment.

## Genomic Polymorphism and Divergence

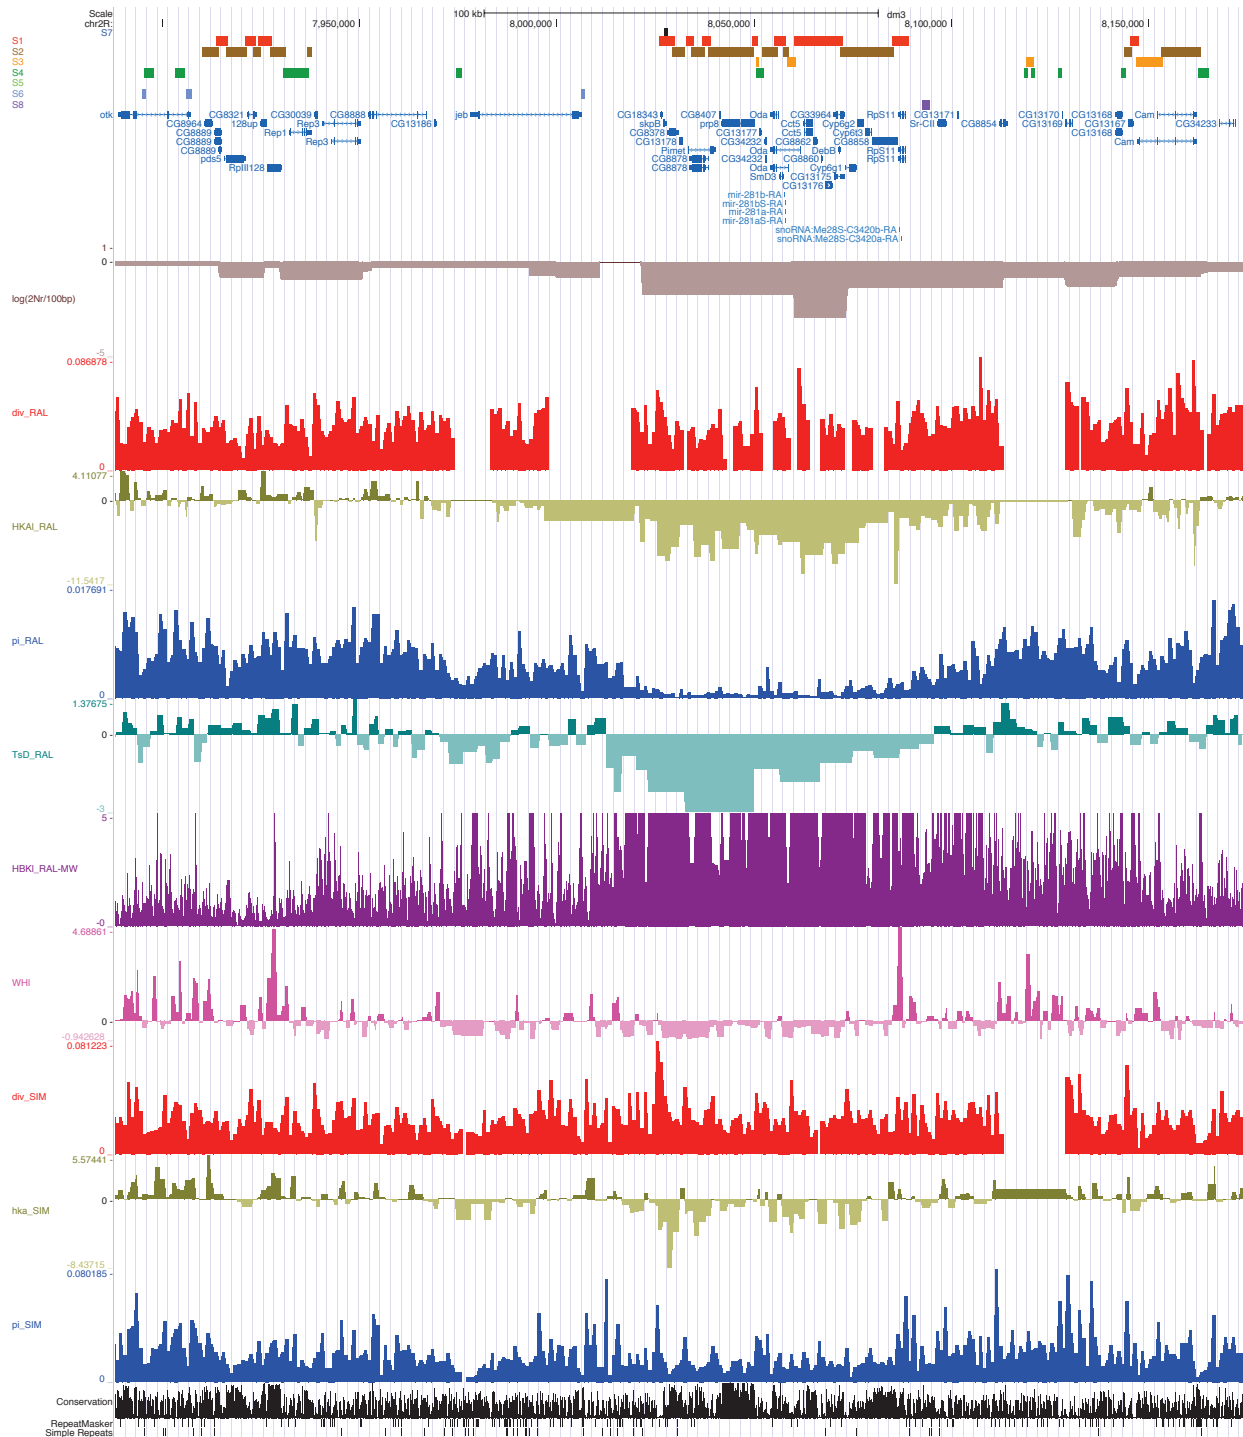

**Figure S10.** — Presentation in the UCSC Genome Browser of the distributions in the 260 kbp *Hen1* (*Pimet*) and *Cyp6g1* region of the population genomic statistics,  $\pi_w$ ,  $\delta_w$ ,  $\hat{\rho}$ ,  $\text{HKAI}$  and  $\text{TsD}$  for the RAL sample as well as *HBKI*, and *WHI*. At the top are *chromatin states 1* through *8*, followed by the Flybase annotated protein coding genes and then by noncoding genes. The eleventh track (down) begins the “custom” tracks from this study with  $\log(\hat{\rho}/100)$ , where  $\hat{\rho}$  is an estimate of  $2N_r$ . At the bottom are three standard UCSC Genome Browser annotation tracks, phylogenetic “Conservation,” “RepeatMasker” and “Simple Repeats.” The browser page from which this figure was extracted can be access via this [track data hub](#). Gaps arise primarily for two reasons: a large repetitive region in the reference sequence(s) or gaps in the multispecies alignment. In the region around *Cyp6g1* gaps are also attributable to the known structural polymorphisms (SCHMIDT *et al.* 2010). Note that the local scales of the various statistics or “tracks” are adaptive and thus variable depending on the range of the variation in the particular window.

**Figure S11.**— [Boxplots of the distributions of  \$\pi\_w\$ ,  \$\delta\_w\$ ,  \$HKAI\$ ,  \$TsD\$ ,  \$HBKI\$  and  \$\log\(\hat{\rho}\)\$  in genomic exonic, intronic and intergenic regions annotated as chromatin states 1 through 9.](#)

Boxplots of the distributions of windows (weighted by bp) of  $\pi_w$  (RAL, MW and SIM),  $\delta_w$  (RAL, MW and SIM),  $HKAI$  (RAL, MW and SIM),  $TsD$  (RAL),  $HBKI$  (RAL ↔ MW) and  $\hat{\rho}$  (RAL) partitioned by chromatin state and gene structure (coding, intron and intergenic). The boxes are the central two quartiles, the whiskers are 1.5 time those, while the transparent light blue dots represent the outliers beyond the whiskers. The axes are labeled: “div” for  $\delta_w$ ; “pi” for  $\pi_w$ ; “HKAI” for  $HKAI$ ; “D\_w” for  $TsD$ ; “HBKI” for  $HBKI$ ; and “2Nr” for  $\hat{\rho}$ .

**Figure S12.**— [ECDFs \(empirical cumulative distribution functions\) of  \$\pi\_w\$ ,  \$\delta\_w\$ ,  \$HKAI\$ ,  \$TsD\$ ,  \$HBKI\$  and  \$\log\(\hat{\rho}\)\$  in genomic exonic, intronic and intergenic regions annotated as chromatin states 1 through 9.](#) Empirical cumulative distribution functions of windows (weighted by bp) of  $\pi_w$  (RAL, MW and SIM),  $\delta_w$  (RAL, MW and SIM),  $HKAI$  (RAL, MW and SIM),  $TsD$  (RAL),  $HBKI$  (RAL ↔ MW) and  $\hat{\rho}$  (RAL) partitioned by chromatin state (see legend in each central panel) and gene structure (coding, intron and intergenic). The axes are labeled: “div” for  $\delta_w$ ; “pi” for  $\pi_w$ ; “HKAI” for  $HKAI$ ; “D\_w” for  $TsD$ ; “HBKI” for  $HBKI$ ; and “2Nr” for  $\hat{\rho}$ .

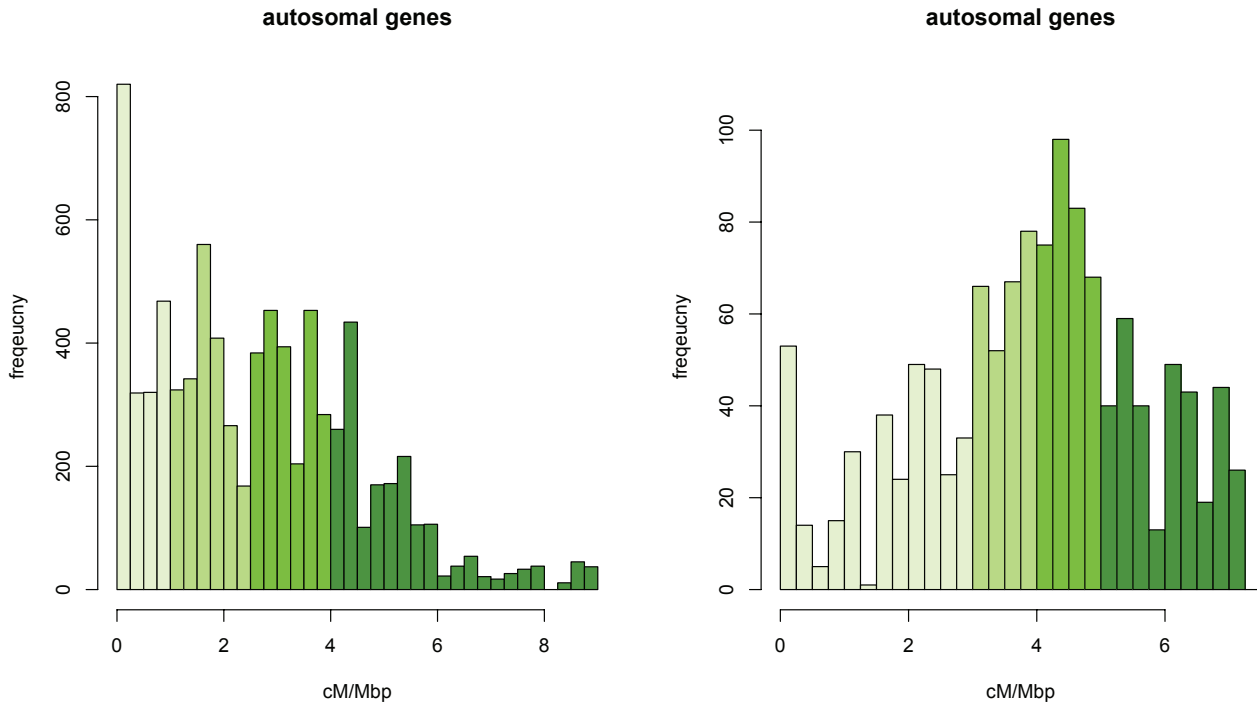

**Figure S13.** — The distribution of recombination rates of genes estimated by *loess* smoothed genetic maps,  $\hat{r}_{15}$  in bins of 0.25 cM/Mbp. Autosomal and X-linked genes are classified into four recombination categories, which are represented with different colors (see text and methods). Darker the color, higher the recombination rate. The bins are for the purpose of showing the variations of recombination rates within each recombination categories.

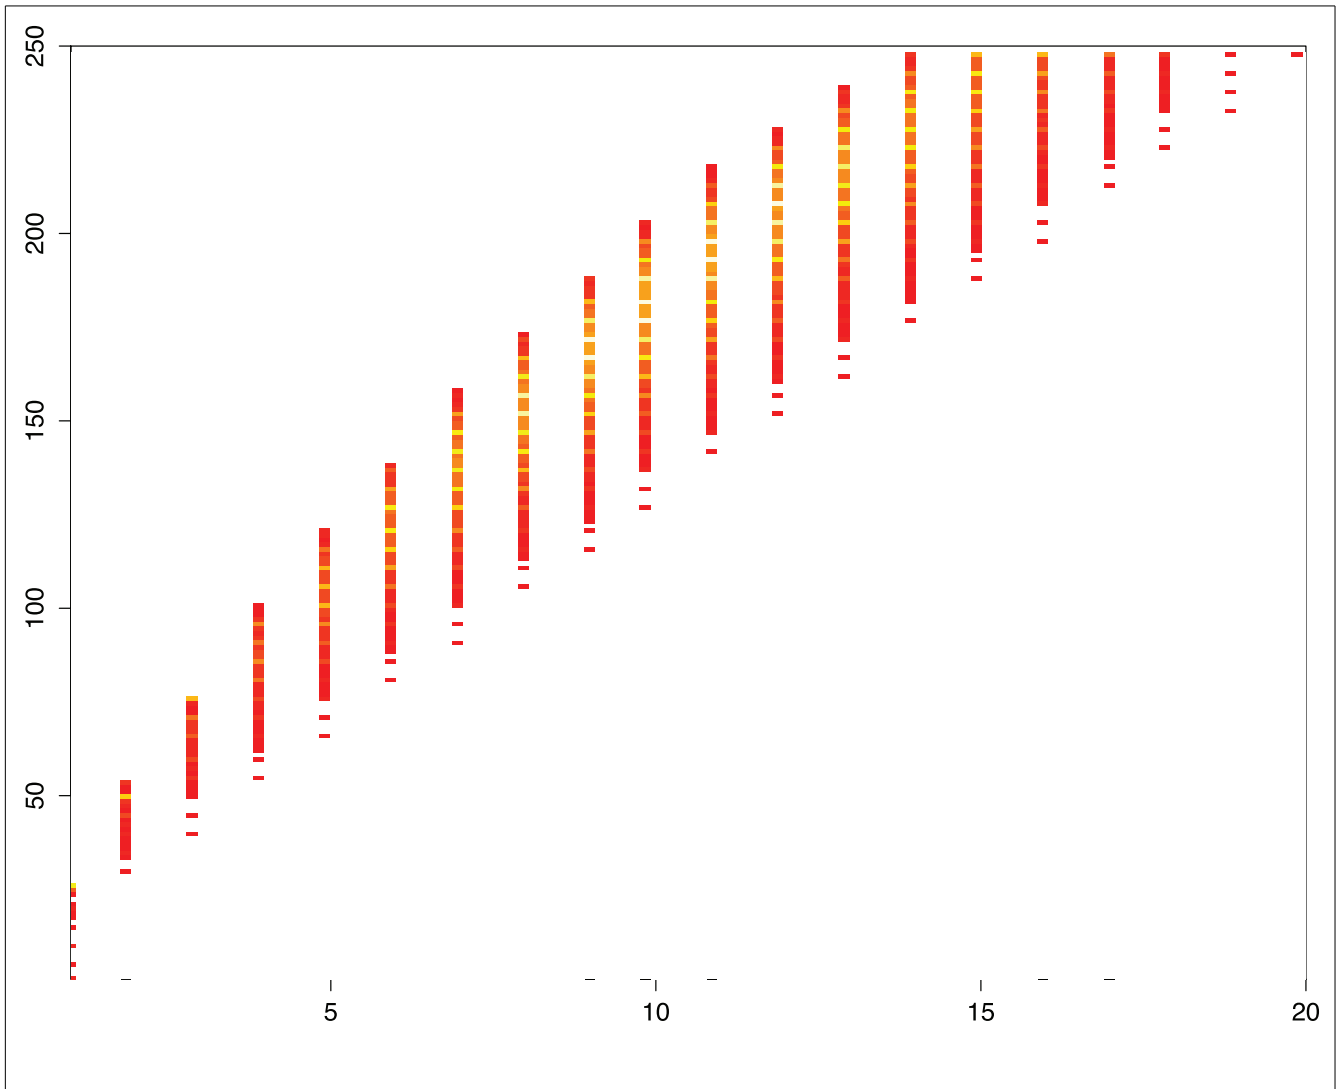

**Figure SA1.** — A two dimensional histogram showing the relationship between consensus quality score and read depth. The MAQ consensus quality score  $Q$  is plotted versus the MAQ consensus sequence depth (number of aligned reads contributing to the consensus). The more nucleotides that fall into a bin, the hotter (red  $\rightarrow$  yellow).

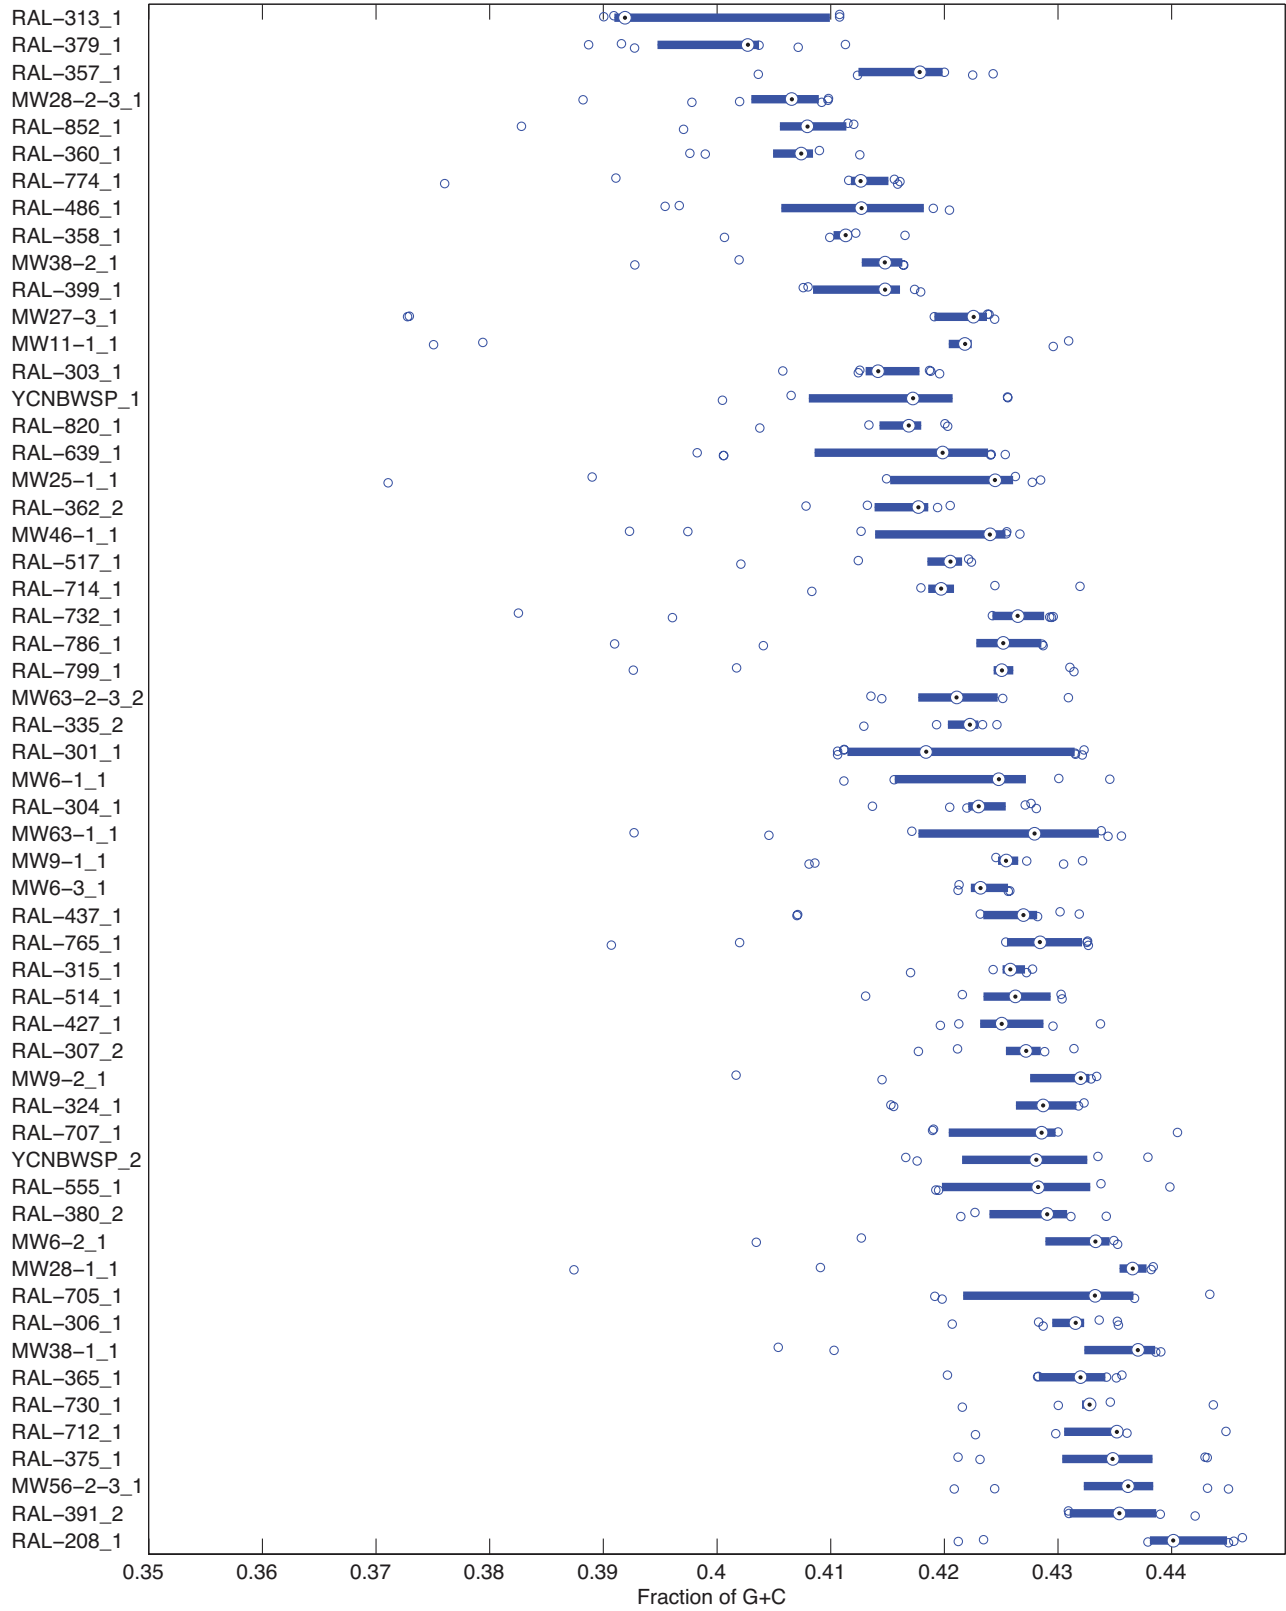

**Figure SB1.**— Box plots of G+C content by flow cell lane for all stocks.



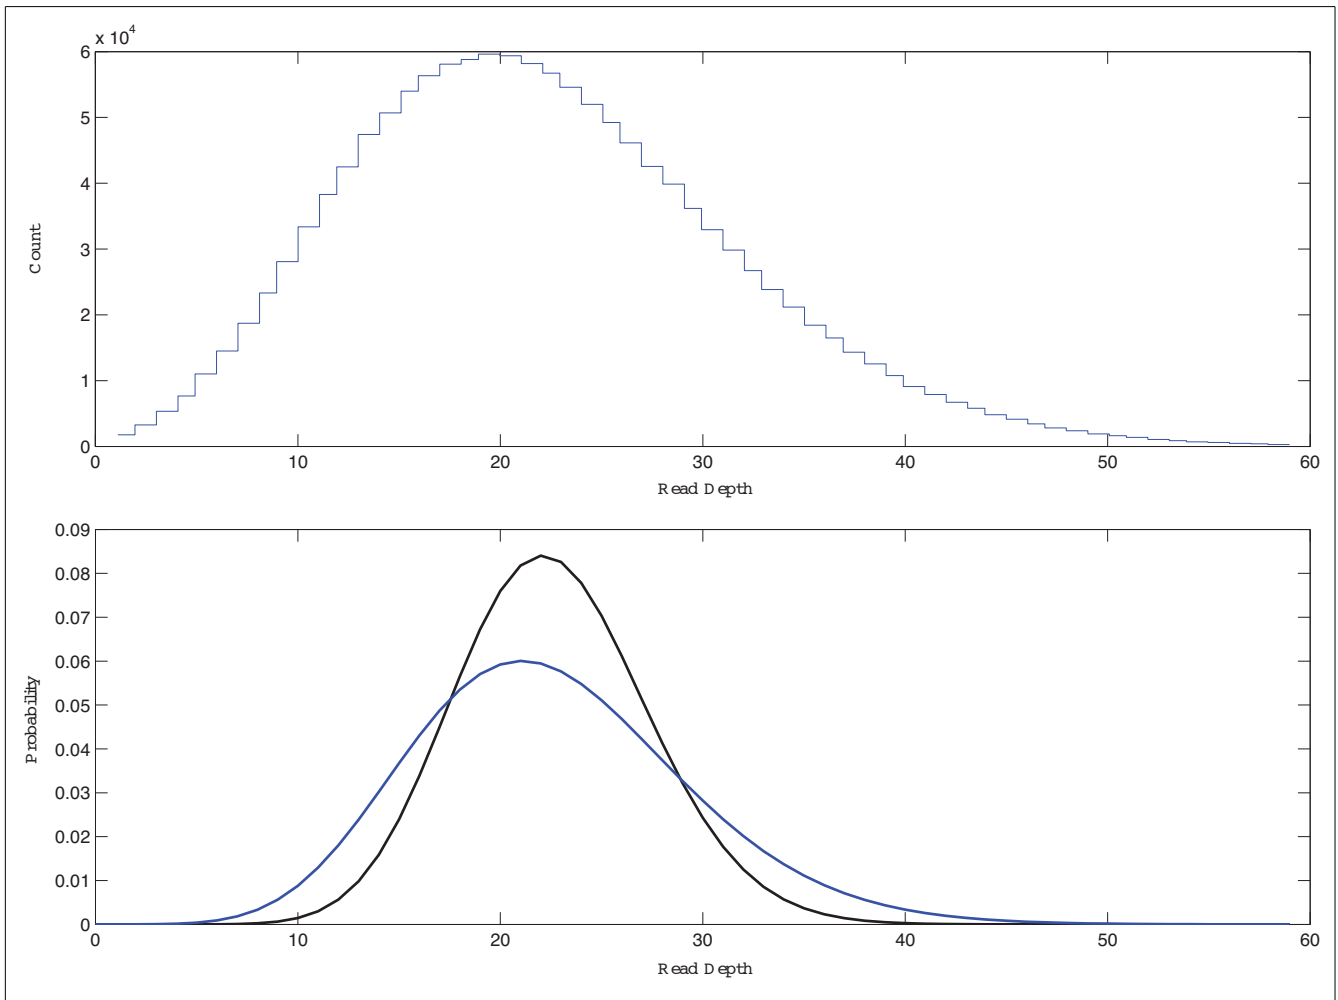

**Figure SB2.**— Empirical and theoretical distributions of read depth illustrating the utility of the negative binomial distribution to model read depth. The histogram for observed read counts (top) for the library `ywcnbwsp1` compared to two probability mass functions (bottom). The Poisson distribution with  $\lambda = 21.6$  is shown in black. The negative binomial distribution with  $\lambda = 21.6$  and  $\eta = 4.29$  is shown in blue.

**Table S1.**  
**Chromosome segments identified as residually heterozygous in the indicated stock/assembly.**

| <i>DPGP stock</i> | <i>chromosome arm</i> | <i>begin</i> | <i>end</i> |
|-------------------|-----------------------|--------------|------------|
| RAL-301_1         | chr2L                 | 1            | 23011544   |
| RAL-301_1         | chr2R                 | 1            | 7300000    |
| RAL-301_1         | chr3L                 | 4800001      | 7600000    |
| RAL-304_1         | chr3L                 | 1            | 1500000    |
| RAL-304_1         | chr3L                 | 21200001     | 24543557   |
| RAL-304_1         | chr3R                 | 1            | 8200000    |
| RAL-306_1         | chr3R                 | 16000001     | 27905053   |
| RAL-306_1         | chr3R                 | 7000001      | 9800000    |
| RAL-307_2         | chr2R                 | 15100001     | 21146708   |
| RAL-307_2         | chr3R                 | 24400001     | 26300000   |
| RAL-307_2         | chrX                  | 20700001     | 22422827   |
| RAL-315_1         | chr2L                 | 1            | 3800000    |
| RAL-335_2         | chr3L                 | 10300001     | 19900000   |
| RAL-335_2         | chr3R                 | 1200001      | 5500000    |
| RAL-335_2         | chr3R                 | 8500001      | 10000000   |
| RAL-357_1         | chr2L                 | 11600001     | 13000000   |
| RAL-357_1         | chr2L                 | 15100001     | 16600000   |
| RAL-357_1         | chr2R                 | 6600001      | 8500000    |
| RAL-357_1         | chr2R                 | 16900001     | 21146708   |
| RAL-358_1         | chr2R                 | 16200001     | 18400000   |
| RAL-360_1         | chr2L                 | 2000001      | 3200000    |
| RAL-360_1         | chr3L                 | 12800001     | 15900000   |
| RAL-375_1         | chr3L                 | 15000001     | 19300000   |
| RAL-375_1         | chr3L                 | 8100001      | 11400000   |
| RAL-375_1         | chr3R                 | 10900001     | 16700000   |
| RAL-380_2         | chr2R                 | 16700001     | 18600000   |
| RAL-391_2         | chr2L                 | 5000001      | 6000000    |
| RAL-391_2         | chr2R                 | 11300001     | 17500000   |
| RAL-399_1         | chr3R                 | 20200001     | 21300000   |
| RAL-486_1         | chr2L                 | 1            | 3800000    |
| RAL-639_1         | chr2L                 | 14000001     | 14900000   |

Genomic Polymorphism and Divergence

|           |       |          |          |
|-----------|-------|----------|----------|
| RAL-705_1 | chr3L | 1        | 3200000  |
| RAL-705_1 | chr3R | 19300001 | 23600000 |
| RAL-707_1 | chr3L | 1        | 1800000  |
| RAL-707_1 | chr3R | 10700001 | 11800000 |
| RAL-714_1 | chr2L | 12500001 | 17500000 |
| RAL-714_1 | chr2L | 7600001  | 9800000  |
| RAL-732_1 | chr3L | 17400001 | 24543557 |
| RAL-732_1 | chr3R | 1        | 27905053 |
| RAL-774_1 | chr2L | 4000001  | 5900000  |
| RAL-774_1 | chr2L | 14400001 | 23011544 |
| RAL-774_1 | chr2R | 1        | 12600000 |
| RAL-774_1 | chr3L | 14600001 | 21400000 |
| RAL-774_1 | chr3R | 12600001 | 15500000 |

**Table S2.**  
**Regions filtered from the genomes *RAL-303\_1*, *RAL-304\_1* and *RAL-306\_1* because of apparent IBD with one another.**

| <i>filtered genome</i> | <i>chromosome arm</i> | <i>begin</i> | <i>end</i> | <i>IBD with genome</i>              |
|------------------------|-----------------------|--------------|------------|-------------------------------------|
| <i>RAL-303_1</i>       | chr2R                 | 17500000     | 18550000   | <i>RAL-306_1</i>                    |
| <i>RAL-303_1</i>       | chrX                  | 0            | 22422827   | <i>RAL-304_1</i> & <i>RAL-306_1</i> |
| <i>RAL-304_1</i>       | chr2L                 | 0            | 6400000    | <i>RAL-303_1</i>                    |
| <i>RAL-304_1</i>       | chr2L                 | 0            | 16000000   | <i>RAL-306_1</i>                    |
| <i>RAL-304_1</i>       | chr3L                 | 0            | 24543557   | <i>RAL-303_1</i> & <i>RAL-306_1</i> |
| <i>RAL-304_1</i>       | chr3R                 | 0            | 27905053   | <i>RAL-303_1</i> & <i>RAL-306_1</i> |
| <i>RAL-304_1</i>       | chrX                  | 0            | 22422827   | <i>RAL-303_1</i> & <i>RAL-306_1</i> |
| <i>RAL-306_1</i>       | chr3L                 | 0            | end        | <i>RAL-303_1</i> & <i>RAL-304_1</i> |
| <i>RAL-306_1</i>       | chr3R                 | 0            | end        | <i>RAL-303_1</i> & <i>RAL-304_1</i> |

**Table S3.**  
RAL sampling depth at Q30 plus the total numbers of assembled bp.

|               | <i>X</i>    | <i>2L</i>   | <i>2R</i>   | <i>3L</i>   | <i>3R</i>   | <i>total</i>  |
|---------------|-------------|-------------|-------------|-------------|-------------|---------------|
| <i>mean</i>   | 32.42       | 32.14       | 33.14       | 31.69       | 31.53       | 32.11         |
| <i>median</i> | 34          | 33          | 34          | 33          | 32          | 33            |
| <i>bp</i>     | 333,706,603 | 478,702,933 | 362,718,910 | 440,887,238 | 482,662,618 | 2,098,678,302 |

**Table S4.**  
MW sampling depth at Q30 plus the total numbers of assembled bp.

|               | <i>X</i>   | <i>2L</i>  | <i>2R</i>  | <i>3L</i>  | <i>3R</i>  | <i>total</i> |
|---------------|------------|------------|------------|------------|------------|--------------|
| <i>mean</i>   | 6.54       | 5.71       | 5.71       | 4.65       | 4.70       | 5.37         |
| <i>median</i> | 7          | 6          | 6          | 5          | 5          | 6            |
| <i>bp</i>     | 61,826,328 | 85,405,440 | 61,141,436 | 64,766,238 | 70,178,732 | 343,318,174  |

**Table S5.**  
SIM sampling depth at Q30 plus the total numbers of assembled bp.

|               | <i>X</i>   | <i>2L</i>  | <i>2R</i>  | <i>3L</i>  | <i>3R</i>  | <i>total</i> |
|---------------|------------|------------|------------|------------|------------|--------------|
| <i>mean</i>   | 3.61       | 4.09       | 4.18       | 4.12       | 4.20       | 4.06         |
| <i>median</i> | 4          | 5          | 5          | 5          | 5          | 5            |
| <i>bp</i>     | 47,048,192 | 65,940,790 | 59,978,450 | 68,152,379 | 84,707,080 | 325,826,891  |

**Table S6:**  
**Potential sampling depth after filtering of residually heterozygous regions and those involved in obvious identity by descent.**

|              | RAL   |     | MW   | SI |
|--------------|-------|-----|------|----|
|              | mean  | max |      | M  |
| <b>X</b>     | 34.92 | 35  | 7    | 6  |
| <b>2L</b>    | 33.90 | 35  | 6    | 6  |
| <b>2R</b>    | 34.97 | 36  | 6    | 6  |
| <b>3L</b>    | 33.29 | 35  | 5    | 6  |
| <b>3R</b>    | 32.95 | 34  | 5    | 6  |
| <b>Total</b> | 33.95 | 35  | 5.76 | 6  |

**Table S7:**  
**RAL allelic depth at Q40 plus the total numbers of assembled bp.**

|               | <b>X</b>    | <b>2L</b>   | <b>2R</b>   | <b>3L</b>   | <b>3R</b>   | <b>total</b>  |
|---------------|-------------|-------------|-------------|-------------|-------------|---------------|
| <b>mean</b>   | 27.73       | 29.38       | 30.21       | 31.69       | 28.86       | 29.02         |
| <b>median</b> | 30          | 31          | 32          | 33          | 30          | 31            |
| <b>bp</b>     | 285,009,253 | 437,320,403 | 330,471,088 | 401,221,253 | 440,908,643 | 1,894,930,640 |

**Table S8:**  
**MW sampling depth at Q40 plus the total numbers of assembled bp.**

|               | <b>X</b>   | <b>2L</b>  | <b>2R</b>  | <b>3L</b>  | <b>3R</b>  | <b>total</b> |
|---------------|------------|------------|------------|------------|------------|--------------|
| <b>mean</b>   | 5.84       | 5.22       | 5.21       | 4.14       | 4.20       | 4.84         |
| <b>median</b> | 6          | 6          | 6          | 5          | 5          | 5            |
| <b>bp</b>     | 54,819,051 | 77,720,775 | 55,441,956 | 57,121,007 | 62,369,042 | 307,471,831  |

**Table S9.**  
SIM sampling depth at Q40 plus the total numbers of assembled bp.

|               | <i>X</i>   | <i>2L</i>  | <i>2R</i>  | <i>3L</i>  | <i>3R</i>  | <i>total</i> |
|---------------|------------|------------|------------|------------|------------|--------------|
| <i>mean</i>   | 3.42       | 3.92       | 4.01       | 3.94       | 4.20       | 3.88         |
| <i>median</i> | 4          | 4          | 4          | 4          | 4          | 4            |
| <i>bp</i>     | 44,488,065 | 62,987,720 | 57,347,630 | 65,118,060 | 81,020,800 | 310,962,275  |

**Table S10.**  
Average sampling depth of coding regions on the X and on the autosomes.

|     | MW   |           | RAL   |           |
|-----|------|-----------|-------|-----------|
|     | X    | autosomes | X     | autosomes |
| Q30 | 6.66 | 5.19      | 31.61 | 32.05     |
| Q40 | 5.81 | 4.55      | 24.95 | 28.15     |

**Table S 11.**  
The correlation of *divergence* or *expected heterozygosity* in 1000 bp windows across each of the five major chromosome arms for the indicated pair of samples.

|           | Divergence |         |         | Expected Heterozygosity |         |         |
|-----------|------------|---------|---------|-------------------------|---------|---------|
|           | RAL-MW     | RAL-SIM | MW-SIM  | RAL-MW                  | RAL-SIM | MW-SIM  |
| <i>X</i>  | 0.98677    | 0.56509 | 0.56513 | 0.55434                 | 0.29756 | 0.46922 |
| <i>2L</i> | 0.98273    | 0.61971 | 0.61706 | 0.73564                 | 0.39305 | 0.45000 |
| <i>2R</i> | 0.98369    | 0.64671 | 0.64276 | 0.74692                 | 0.36125 | 0.38505 |
| <i>3L</i> | 0.97959    | 0.63912 | 0.63543 | 0.75501                 | 0.33818 | 0.32805 |
| <i>3R</i> | 0.98272    | 0.63757 | 0.63603 | 0.70080                 | 0.32807 | 0.33591 |

**Table S12.**  
[Genetic-map-based estimates of the rate of recombination per bp, in “lettered” cytogenetic intervals of the five major chromosome arms. The assigned map position in cM is given in column two of each of the five sets \(one for each of the chromosome arms\).](#)

**Table S13**  
**Distribution of missing data and statistics of partitions used**  
**in the *Ldhat*-based estimation of recombination.**

| Chromosome | # Blocks | # non-missing haplotypes |     |      | Average bps<br>between<br>consecutive<br>SNPs |
|------------|----------|--------------------------|-----|------|-----------------------------------------------|
|            |          | Min                      | Max | Ave  |                                               |
| 2L         | 20       | 32                       | 35  | 33.6 | 130                                           |
| 2R         | 14       | 32                       | 36  | 34.2 | 145                                           |
| 3L         | 18       | 31                       | 35  | 33.2 | 146                                           |
| 3R         | 21       | 32                       | 34  | 33.3 | 151                                           |
| X          | 2        | 34                       | 35  | 34.5 | 406                                           |

**Table S14**  
**The centromere proximal and telomere-proximal regions of the 5 major chromosome arms**  
**filtered or “trimmed” because of the preponderance of repetitive sequences and strong**  
**systematic effects associated with centromeres and telomeres (see text).**

2L:

RAL: 0 to 844225 and 19946732 to the end.  
 MW: 0 to 698949 and 19954780 to the end.  
 SIM: 0 to 650976 and 20052632 to the end.

2R:

RAL: 0 to 6063980 and 20322335 to the end.  
 MW: 0 to 6090470 and 20020890 to the end.  
 SIM: 0 to 2935239 and 20321706 to the end.

3L:

RAL: 0 to 447386 and 18392988 to the end.  
 MW: 0 to 356604 and 18408033 to the end.  
 (14656580 to the end, except for two 4096  
 SNP windows in which  $\chi[\log(p_{HKAI})] > 0$  )  
 SIM: 0 to 897221 and 21109190 to the end.

3R:

RAL: 0 to 7940899 and 27237549 to the end.  
 MW: 0 to 8349278 and 27248244 to the end.  
 SIM: 0 to 2765860 and 26741546 to the end.

X:

RAL: 0 to 1036552 and 20902578 to the end.  
 MW: 0 to 2460008 and 20665672 to the end.

*Genomic Polymorphism and Divergence*

- SIM: 0 to 2200059 and 19271518 to the end.
- 2L:  
RAL: 0 to 844225 and 19946732 to the end.  
MW: 0 to 698949 and 19954780 to the end.  
SIM: 0 to 650976 and 20052632 to the end.
- 2R:  
RAL: 0 to 6063980 and 20322335 to the end.  
MW: 0 to 6090470 and 20020890 to the end.  
SIM: 0 to 2935239 and 20321706 to the end.
- 3L:  
RAL: 0 to 447386 and 18392988 to the end.  
MW: 0 to 356604 and 18408033 to the end.  
(14656580 to the end, except for two 4096  
SNP windows in which  $\chi[\log(p_{HKAI})] > 0$ )  
SIM: 0 to 897221 and 21109190 to the end.
- 3R:  
RAL: 0 to 7940899 and 27237549 to the end.  
MW: 0 to 8349278 and 27248244 to the end.  
SIM: 0 to 2765860 and 26741546 to the end.
- X:  
RAL: 0 to 1036552 and 20902578 to the end.  
MW: 0 to 2460008 and 20665672 to the end.  
SIM: 0 to 2200059 and 19271518 to the end.



Table S15

The correlations between the logarithm of the estimated rates of recombination (  $\log(\hat{r}_{15})$  ,  $\log(\hat{\rho}_{15})$  ,  $\log(\hat{\rho})$  ) with  $\pi_w$ , *HKAl*, *TsD*, or *HBKl* for each chromosome arm in the RAL, MW and SIM samples (see text).

| sample | U T | statistic               |             | chromosome arms |         |         |         |           |         |         |
|--------|-----|-------------------------|-------------|-----------------|---------|---------|---------|-----------|---------|---------|
|        |     | 1                       | 2           | chr2L           | chr2R   | chr3L   | chr3R   | autosomes | chrX    | all     |
| RAL-MW | U   | $\log(\hat{\rho})$      | <i>HBKl</i> | -0.0162         | -0.0639 | -0.0678 | -0.0289 | -0.0489   | -0.0060 | -0.0026 |
| RAL-MW | T   | $\log(\hat{\rho})$      | <i>HBKl</i> | -0.0254         | -0.1119 | -0.0568 | -0.0727 | -0.0759   | -0.0098 | -0.0054 |
| MW     | U   | $\log(\hat{\rho})$      | <i>HKAl</i> | 0.5624          | 0.6320  | 0.6875  | 0.5230  | 0.6049    | 0.3315  | 0.5603  |
| MW     | T   | $\log(\hat{\rho})$      | <i>HKAl</i> | 0.2143          | 0.2549  | 0.2135  | 0.1602  | 0.2006    | 0.0483  | 0.1655  |
| RAL    | U   | $\log(\hat{\rho})$      | <i>HKAl</i> | 0.5838          | 0.6781  | 0.7198  | 0.5827  | 0.6436    | 0.2181  | 0.5786  |
| RAL    | T   | $\log(\hat{\rho})$      | <i>HKAl</i> | 0.2692          | 0.3363  | 0.2145  | 0.2548  | 0.2584    | 0.0486  | 0.2131  |
| SIM    | U   | $\log(\hat{\rho})$      | <i>HKAl</i> | 0.6153          | 0.2782  | 0.3820  | 0.4413  | 0.4264    | 0.3910  | 0.4173  |
| SIM    | T   | $\log(\hat{\rho})$      | <i>HKAl</i> | 0.1304          | 0.1539  | 0.1671  | 0.1382  | 0.1406    | 0.0892  | 0.1319  |
| MW     | U   | $\log(\hat{\rho})$      | $\pi_w$     | 0.4451          | 0.4568  | 0.5257  | 0.4407  | 0.4838    | 0.3217  | 0.4542  |
| MW     | T   | $\log(\hat{\rho})$      | $\pi_w$     | 0.2858          | 0.2417  | 0.2737  | 0.1861  | 0.2632    | 0.1425  | 0.2337  |
| RAL    | U   | $\log(\hat{\rho})$      | $\pi_w$     | 0.4541          | 0.4964  | 0.5342  | 0.4870  | 0.5064    | 0.2187  | 0.4169  |
| RAL    | T   | $\log(\hat{\rho})$      | $\pi_w$     | 0.3175          | 0.3199  | 0.2939  | 0.2819  | 0.3181    | 0.1345  | 0.2186  |
| SIM    | U   | $\log(\hat{\rho})$      | $\pi_w$     | 0.2351          | 0.1493  | 0.1803  | 0.1460  | 0.1834    | 0.2422  | 0.1762  |
| SIM    | T   | $\log(\hat{\rho})$      | $\pi_w$     | 0.1056          | 0.0845  | 0.0757  | 0.0888  | 0.0994    | 0.0884  | 0.0733  |
| MW     | U   | $\log(\hat{\rho})$      | <i>TsD</i>  | 0.0473          | 0.1275  | 0.0850  | 0.0739  | 0.0829    | 0.0678  | 0.0742  |
| MW     | T   | $\log(\hat{\rho})$      | <i>TsD</i>  | 0.0340          | 0.0892  | 0.0446  | 0.0641  | 0.0481    | 0.0168  | 0.0325  |
| RAL    | U   | $\log(\hat{\rho})$      | <i>TsD</i>  | 0.1328          | 0.2471  | 0.3724  | 0.2410  | 0.2598    | 0.0480  | 0.1898  |
| RAL    | T   | $\log(\hat{\rho})$      | <i>TsD</i>  | 0.0185          | 0.0848  | 0.0724  | 0.1272  | 0.0802    | 0.0959  | 0.0625  |
| RAL-MW | U   | $\log(\hat{\rho}_{15})$ | <i>HBKl</i> | -0.0082         | 0.0543  | 0.0050  | 0.0467  | 0.0167    | 0.0226  | 0.1099  |
| RAL-MW | T   | $\log(\hat{\rho}_{15})$ | <i>HBKl</i> | 0.0517          | 0.0087  | 0.0142  | 0.0286  | -0.0047   | 0.0179  | 0.1746  |
| MW     | U   | $\log(\hat{\rho}_{15})$ | <i>HKAl</i> | 0.5648          | 0.5596  | 0.7337  | 0.6196  | 0.6052    | 0.3547  | 0.5775  |
| MW     | T   | $\log(\hat{\rho}_{15})$ | <i>HKAl</i> | 0.2184          | 0.1338  | 0.3154  | 0.0813  | 0.1521    | 0.0341  | 0.1237  |
| RAL    | U   | $\log(\hat{\rho}_{15})$ | <i>HKAl</i> | 0.5328          | 0.5196  | 0.7458  | 0.6612  | 0.6060    | 0.1945  | 0.5687  |
| RAL    | T   | $\log(\hat{\rho}_{15})$ | <i>HKAl</i> | 0.2012          | 0.1476  | 0.1530  | 0.1618  | 0.1400    | -0.0007 | 0.1204  |
| SIM    | U   | $\log(\hat{\rho}_{15})$ | <i>HKAl</i> | 0.5775          | 0.3819  | 0.3073  | 0.4900  | 0.4032    | 0.4508  | 0.4027  |
| SIM    | T   | $\log(\hat{\rho}_{15})$ | <i>HKAl</i> | 0.0100          | 0.0033  | 0.0564  | 0.0853  | 0.0307    | -0.0136 | 0.0309  |
| MW     | U   | $\log(\hat{\rho}_{15})$ | $\pi_w$     | 0.4302          | 0.3654  | 0.5581  | 0.4783  | 0.4812    | 0.2948  | 0.4562  |
| MW     | T   | $\log(\hat{\rho}_{15})$ | $\pi_w$     | 0.2308          | 0.0992  | 0.3200  | 0.0984  | 0.2166    | 0.0381  | 0.1752  |
| RAL    | U   | $\log(\hat{\rho}_{15})$ | $\pi_w$     | 0.3974          | 0.3488  | 0.5236  | 0.4746  | 0.4574    | 0.1525  | 0.3343  |
| RAL    | T   | $\log(\hat{\rho}_{15})$ | $\pi_w$     | 0.2023          | 0.1226  | 0.2282  | 0.1618  | 0.2125    | 0.0140  | 0.0122  |
| SIM    | U   | $\log(\hat{\rho}_{15})$ | $\pi_w$     | 0.1467          | 0.1081  | 0.1033  | 0.1149  | 0.1261    | 0.2568  | 0.1009  |
| SIM    | T   | $\log(\hat{\rho}_{15})$ | $\pi_w$     | 0.0034          | -0.0549 | -0.0508 | 0.0432  | 0.0141    | 0.0247  | -0.0428 |
| MW     | U   | $\log(\hat{\rho}_{15})$ | <i>TsD</i>  | 0.1040          | 0.1179  | -0.0436 | 0.0543  | 0.0482    | 0.0578  | 0.0346  |
| MW     | T   | $\log(\hat{\rho}_{15})$ | <i>TsD</i>  | 0.0502          | 0.0514  | 0.0021  | 0.0636  | 0.0227    | 0.0219  | -0.0117 |
| RAL    | U   | $\log(\hat{\rho}_{15})$ | <i>TsD</i>  | 0.1324          | 0.1396  | 0.3084  | 0.1989  | 0.1997    | -0.0021 | 0.1185  |
| RAL    | T   | $\log(\hat{\rho}_{15})$ | <i>TsD</i>  | 0.0382          | 0.0324  | 0.1177  | 0.0282  | 0.0182    | 0.0024  | -0.0595 |
| RAL-MW | U   | $\log(\hat{r}_{15})$    | <i>HBKl</i> | -0.0228         | 0.0399  | -0.0002 | 0.0676  | 0.0206    | 0.1435  | 0.0975  |
| RAL-MW | T   | $\log(\hat{r}_{15})$    | <i>HBKl</i> | 0.0420          | 0.0049  | 0.0142  | 0.0631  | 0.0321    | 0.0121  | 0.1173  |
| MW     | U   | $\log(\hat{r}_{15})$    | <i>HKAl</i> | 0.4989          | 0.6084  | 0.6005  | 0.5607  | 0.5677    | 0.4026  | 0.5556  |
| MW     | T   | $\log(\hat{r}_{15})$    | <i>HKAl</i> | 0.1661          | 0.0548  | 0.2912  | 0.0695  | 0.1789    | -0.0049 | 0.1549  |
| RAL    | U   | $\log(\hat{r}_{15})$    | <i>HKAl</i> | 0.4605          | 0.5863  | 0.5460  | 0.5392  | 0.5315    | 0.2333  | 0.5132  |
| RAL    | T   | $\log(\hat{r}_{15})$    | <i>HKAl</i> | 0.1592          | 0.0592  | 0.1492  | 0.1084  | 0.1192    | -0.0485 | 0.1052  |
| SIM    | U   | $\log(\hat{r}_{15})$    | <i>HKAl</i> | 0.5756          | 0.2264  | 0.2624  | 0.3203  | 0.3603    | 0.5216  | 0.3747  |
| SIM    | T   | $\log(\hat{r}_{15})$    | <i>HKAl</i> | 0.0047          | 0.0030  | 0.0635  | 0.0737  | 0.0450    | 0.0695  | 0.0472  |
| MW     | U   | $\log(\hat{r}_{15})$    | $\pi_w$     | 0.3486          | 0.3402  | 0.4515  | 0.4531  | 0.3898    | 0.2688  | 0.3791  |
| MW     | T   | $\log(\hat{r}_{15})$    | $\pi_w$     | 0.1584          | 0.0098  | 0.2183  | 0.0501  | 0.1194    | 0.0148  | 0.1072  |
| RAL    | U   | $\log(\hat{r}_{15})$    | $\pi_w$     | 0.3295          | 0.3430  | 0.3895  | 0.4210  | 0.3610    | 0.1175  | 0.2795  |
| RAL    | T   | $\log(\hat{r}_{15})$    | $\pi_w$     | 0.1427          | 0.0093  | 0.1370  | 0.0643  | 0.0927    | -0.0214 | -0.0037 |
| SIM    | U   | $\log(\hat{r}_{15})$    | $\pi_w$     | -0.0988         | -0.0953 | -0.0654 | 0.0063  | -0.0432   | -0.0046 | -0.0485 |
| SIM    | T   | $\log(\hat{r}_{15})$    | $\pi_w$     | -0.0077         | -0.0536 | -0.1165 | 0.0243  | -0.0438   | 0.0248  | -0.0711 |
| MW     | U   | $\log(\hat{r}_{15})$    | <i>TsD</i>  | 0.0224          | 0.0794  | -0.0283 | 0.0465  | 0.0282    | 0.0476  | 0.0210  |
| MW     | T   | $\log(\hat{r}_{15})$    | <i>TsD</i>  | 0.0518          | 0.0392  | 0.0064  | 0.0456  | 0.0419    | 0.0090  | 0.0213  |
| RAL    | U   | $\log(\hat{r}_{15})$    | <i>TsD</i>  | 0.1276          | 0.1586  | 0.2417  | 0.1996  | 0.1844    | -0.0717 | 0.1083  |
| RAL    | T   | $\log(\hat{r}_{15})$    | <i>TsD</i>  | -0.0411         | -0.0110 | 0.0924  | 0.0074  | 0.0252    | -0.0471 | -0.0266 |

Table S16.

Amino acid replacement  $F_{ST}$  GO enrichment analysis – *biological categories*.

| GO category | proportion significant genes | p-values | GOslim description                  | GO description                                                                                                                                                                                                                                                                                                   |
|-------------|------------------------------|----------|-------------------------------------|------------------------------------------------------------------------------------------------------------------------------------------------------------------------------------------------------------------------------------------------------------------------------------------------------------------|
| GO:0042060  | 0.833                        | 0.0001   | NA                                  | The series of events that restore integrity to a damaged tissue, following an injury.                                                                                                                                                                                                                            |
| GO:0006807  | 0.667                        | 0.0002   | nitrogen compound metabolic process | The chemical reactions and pathways involving various organic and inorganic nitrogenous compounds; includes nitrogen fixation, nitrification, denitrification, assimilatory/dissimilatory nitrate reduction and the interconversion of nitrogenous organic matter and ammonium.                                  |
| GO:0006887  | 0.667                        | 0.0002   | exocytosis                          | A process of secretion by a cell that results in the release of intracellular molecules (e.g. hormones, matrix proteins) contained within a membrane-bounded vesicle by fusion of the vesicle with the plasma membrane of a cell. This is the process whereby most molecules are secreted from eukaryotic cells. |
| GO:0008152  | 0.239                        | 0.0003   | metabolic process                   | The chemical reactions and pathways, including anabolism and catabolism, by which living organisms transform chemical substances. Metabolic processes typically transform small molecules, but also include macromolecular processes such as DNA repair and replication, and protein synthesis and degradation.  |
| GO:0050909  | 0.364                        | 0.0003   | NA                                  | The series of events required for an organism to receive a gustatory stimulus, convert it to a molecular signal, and recognize and characterize the signal. Gustation involves the direct detection of chemical composition, usually through contact with chemoreceptor cells. This is a neurological process.   |
| GO:0046529  | 0.556                        | 0.0005   | NA                                  | The joining of the parts of the wing imaginal discs, giving rise to the adult thorax.                                                                                                                                                                                                                            |

|            |       |        |                                          |                                                                                                                                                                                                                                                                                                                                                                                                                                                                            |
|------------|-------|--------|------------------------------------------|----------------------------------------------------------------------------------------------------------------------------------------------------------------------------------------------------------------------------------------------------------------------------------------------------------------------------------------------------------------------------------------------------------------------------------------------------------------------------|
| GO:0007561 | 0.571 | 0.0006 | imaginal disc eversion                   | The eversion (turning inside out) of imaginal discs from their peripodial sacs, resulting in movement of the epithelium to the outside of the larval epidermis.                                                                                                                                                                                                                                                                                                            |
| GO:0007296 | 0.600 | 0.0017 | vitellogenesis                           | The production of yolk. Yolk is a mixture of materials used for embryonic nutrition.                                                                                                                                                                                                                                                                                                                                                                                       |
| GO:0006310 | 0.500 | 0.0025 | DNA recombination                        | Any process by which a new genotype is formed by reassortment of genes resulting in gene combinations different from those that were present in the parents. In eukaryotes genetic recombination can occur by chromosome assortment, intrachromosomal recombination, or nonreciprocal interchromosomal recombination. Intrachromosomal recombination occurs by crossing over. In bacteria it may occur by genetic transformation, conjugation, transduction, or F-duction. |
| GO:0007362 | 0.417 | 0.004  | terminal region determination            | Specification of the terminal regions (the two non-segmented ends) of the embryo by the gap genes; exemplified in insects by the actions of huckebein and tailless gene products.                                                                                                                                                                                                                                                                                          |
| GO:0009620 | 0.500 | 0.0042 | NA                                       | A change in state or activity of a cell or an organism (in terms of movement, secretion, enzyme production, gene expression, etc.) as a result of a stimulus from a fungus.                                                                                                                                                                                                                                                                                                |
| GO:0008298 | 0.375 | 0.0046 | intracellular mRNA localization          | Any process by which mRNA is transported to, or maintained in, a specific location within the cell.                                                                                                                                                                                                                                                                                                                                                                        |
| GO:0046907 | 0.500 | 0.0048 | NA                                       | The directed movement of substances within a cell.                                                                                                                                                                                                                                                                                                                                                                                                                         |
| GO:0007030 | 0.385 | 0.0057 | Golgi organization                       | A process that is carried out at the cellular level which results in the assembly, arrangement of constituent parts, or disassembly of the Golgi apparatus.                                                                                                                                                                                                                                                                                                                |
| GO:0007426 | 0.385 | 0.0067 | tracheal outgrowth, open tracheal system | The projection of branches of an open tracheal system towards their target tissues. An example of this is found in <i>Drosophila melanogaster</i> .                                                                                                                                                                                                                                                                                                                        |
| GO:0045610 | 0.429 | 0.0088 | NA                                       | Any process that modulates the frequency, rate or extent of hemocyte differentiation.                                                                                                                                                                                                                                                                                                                                                                                      |

*Genomic Polymorphism and Divergence*

|            |       |        |                                           |                                                                                                                                                                                                                                                                                                                                                                                                     |
|------------|-------|--------|-------------------------------------------|-----------------------------------------------------------------------------------------------------------------------------------------------------------------------------------------------------------------------------------------------------------------------------------------------------------------------------------------------------------------------------------------------------|
| GO:0007157 | 0.429 | 0.0111 | heterophilic cell adhesion                | The attachment of an adhesion molecule in one cell to a nonidentical adhesion molecule in an adjacent cell.                                                                                                                                                                                                                                                                                         |
| GO:0008285 | 0.364 | 0.0126 | negative regulation of cell proliferation | Any process that stops, prevents or reduces the rate or extent of cell proliferation.                                                                                                                                                                                                                                                                                                               |
| GO:0007131 | 0.364 | 0.0138 | reciprocal meiotic recombination          | The cell cycle process whereby double strand breaks are formed and repaired through a double Holliday junction intermediate. This results in the equal exchange of genetic material between non-sister chromatids in a pair of homologous chromosomes. These reciprocal recombinant products ensure the proper segregation of homologous chromosomes during meiosis I and create genetic diversity. |
| GO:0007265 | 0.364 | 0.0144 | Ras protein signal transduction           | A series of molecular signals within the cell that are mediated by a member of the Ras superfamily of proteins switching to a GTP-bound active state.                                                                                                                                                                                                                                               |
| GO:0046843 | 0.316 | 0.0148 | NA                                        | Establishment of the dorsal filaments, elaborate specializations of the chorion that protrude from the anterior end of the egg and facilitate embryonic respiration.                                                                                                                                                                                                                                |
| GO:0000165 | 0.375 | 0.0172 | MAPKKK cascade                            | A cascade of at least three protein kinase activities culminating in the phosphorylation and activation of a MAP kinase. MAPKKK cascades lie downstream of numerous signaling pathways.                                                                                                                                                                                                             |
| GO:0006259 | 0.211 | 0.019  | DNA metabolic process                     | The chemical reactions and pathways involving DNA, deoxyribonucleic acid, one of the two main types of nucleic acid, consisting of a long, unbranched macromolecule formed from one, or more commonly, two, strands of linked deoxyribonucleotides.                                                                                                                                                 |
| GO:0006726 | 0.375 | 0.0203 | eye pigment biosynthetic process          | The chemical reactions and pathways resulting in the formation of eye pigments, any general or particular coloring matter in living organisms, found or utilized in the eye.                                                                                                                                                                                                                        |
| GO:0006727 | 0.333 | 0.021  | ommochrome biosynthetic process           | The chemical reactions and pathways resulting in the formation of ommochromes, any of a large group of natural polycyclic pigments commonly found in the Arthropoda, particularly in the ommatidia of the compound eye.                                                                                                                                                                             |

Genomic Polymorphism and Divergence

|            |       |        |                                   |                                                                                                                                                                                                                                                     |
|------------|-------|--------|-----------------------------------|-----------------------------------------------------------------------------------------------------------------------------------------------------------------------------------------------------------------------------------------------------|
| GO:0033227 | 0.313 | 0.021  | NA                                | The directed movement of dsRNA, double-stranded ribonucleic acid, into, out of, within or between cells by means of some external agent such as a transporter or pore.                                                                              |
| GO:0007298 | 0.256 | 0.0214 | border follicle cell migration    | The directed movement of the border cells through the nurse cells to reach the oocyte. An example of this is found in <i>Drosophila melanogaster</i> .                                                                                              |
| GO:0009617 | 0.375 | 0.0223 | NA                                | A change in state or activity of a cell or an organism (in terms of movement, secretion, enzyme production, gene expression, etc.) as a result of a stimulus from a bacterium.                                                                      |
| GO:0006856 | 0.400 | 0.0229 | eye pigment precursor transport   | The directed movement of eye pigment precursors, the inactive forms of visual pigments, into, out of, within or between cells by means of some external agent such as a transporter or pore.                                                        |
| GO:0007605 | 0.400 | 0.0229 | sensory perception of sound       | The series of events required for an organism to receive an auditory stimulus, convert it to a molecular signal, and recognize and characterize the signal. Sonic stimuli are detected in the form of vibrations and are processed to form a sound. |
| GO:0006869 | 0.400 | 0.0234 | lipid transport                   | The directed movement of lipids into, out of, within or between cells by means of some external agent such as a transporter or pore. Lipids are compounds soluble in an organic solvent but not, or sparingly, in an aqueous solvent.               |
| GO:0006378 | 0.333 | 0.0242 | mRNA polyadenylation              | The enzymatic addition of a sequence of 40-200 adenylyl residues at the 3' end of a eukaryotic mRNA primary transcript.                                                                                                                             |
| GO:0006352 | 0.400 | 0.0244 | transcription initiation          | Any process involved in the assembly of the RNA polymerase complex at the promoter region of a DNA template, resulting in the subsequent synthesis of RNA from that promoter.                                                                       |
| GO:0006904 | 0.400 | 0.0245 | vesicle docking during exocytosis | The initial attachment of a vesicle membrane to a target membrane, mediated by proteins protruding from the membrane of the vesicle and the target membrane, during exocytosis.                                                                     |

|            |       |        |                                                                |                                                                                                                                                                                                                                                                                                                                      |
|------------|-------|--------|----------------------------------------------------------------|--------------------------------------------------------------------------------------------------------------------------------------------------------------------------------------------------------------------------------------------------------------------------------------------------------------------------------------|
| GO:0007307 | 0.333 | 0.0245 | eggshell chorion gene amplification                            | Amplification by up to 60-fold of the loci containing the chorion gene clusters. Amplification is necessary for the rapid synthesis of chorion proteins by the follicle cells, and occurs by repeated firing of one or more origins located within each gene cluster.                                                                |
| GO:0006967 | 0.400 | 0.0247 | positive regulation of antifungal peptide biosynthetic process | Any process that activates or increases the frequency, rate, or extent of antifungal peptide biosynthesis.                                                                                                                                                                                                                           |
| GO:0006777 | 0.400 | 0.0248 | Mo-molybdopterin cofactor biosynthetic process                 | The chemical reactions and pathways resulting in the formation of the Mo-molybdopterin cofactor, essential for the catalytic activity of some enzymes. The cofactor consists of a mononuclear molybdenum (Mo) ion coordinated by one or two molybdopterin ligands.                                                                   |
| GO:0042386 | 0.400 | 0.0255 | NA                                                             | The process whereby a relatively unspecialized cell acquires the characteristics of a mature hemocyte. Hemocytes are blood cells associated with a hemocoel (the cavity containing most of the major organs of the arthropod body) which are involved in defense and clotting of hemolymph, but not involved in transport of oxygen. |
| GO:0016202 | 0.400 | 0.0256 | NA                                                             | Any process that modulates the frequency, rate or extent of striated muscle development.                                                                                                                                                                                                                                             |
| GO:0019732 | 0.400 | 0.0256 | NA                                                             | An immune response against a fungus mediated through a body fluid. An example of this process is the antifungal humoral response in <i>Drosophila melanogaster</i> .                                                                                                                                                                 |
| GO:0008333 | 0.400 | 0.0257 | endosome to lysosome transport                                 | The directed movement of substances from endosomes to lysosomes.                                                                                                                                                                                                                                                                     |
| GO:0042810 | 0.400 | 0.0259 | NA                                                             | The chemical reactions and pathways involving pheromones, a substance that is secreted and released by an organism and detected by a second organism of the same or a closely related species, in which it causes a specific reaction, such as a definite behavioral reaction or a developmental process.                            |

|            |       |        |                                               |                                                                                                                                                                                                                                                                                                                                                                                                                                                                                                |
|------------|-------|--------|-----------------------------------------------|------------------------------------------------------------------------------------------------------------------------------------------------------------------------------------------------------------------------------------------------------------------------------------------------------------------------------------------------------------------------------------------------------------------------------------------------------------------------------------------------|
| GO:0007613 | 0.400 | 0.026  | memory                                        | The activities involved in the mental information processing system that receives (registers), modifies, stores, and retrieves informational stimuli. The main stages involved in the formation and retrieval of memory are encoding (processing of received information by acquisition), storage (building a permanent record of received information as a result of consolidation) and retrieval (calling back the stored information and use it in a suitable way to execute a given task). |
| GO:0030111 | 0.400 | 0.0268 | NA                                            | Any process that modulates the frequency, rate or extent of the activity of the Wnt receptor mediated signal transduction pathway.                                                                                                                                                                                                                                                                                                                                                             |
| GO:0050830 | 0.308 | 0.0274 | NA                                            | Reactions triggered in response to the presence of a Gram-positive bacterium that act to protect the cell or organism.                                                                                                                                                                                                                                                                                                                                                                         |
| GO:0008293 | 0.294 | 0.0285 | torso signaling pathway                       | The series of molecular signals generated as a consequence of the torso transmembrane receptor tyrosine kinase binding to its physiological ligand.                                                                                                                                                                                                                                                                                                                                            |
| GO:0016477 | 0.308 | 0.0286 | NA                                            | The orderly movement of cells from one site to another, often during the development of a multicellular organism or multicellular structure.                                                                                                                                                                                                                                                                                                                                                   |
| GO:0008586 | 0.273 | 0.0294 | imaginal disc-derived wing vein morphogenesis | The process by which anatomical structures of the veins on an imaginal disc-derived wing are generated and organized. Morphogenesis pertains to the creation of form.                                                                                                                                                                                                                                                                                                                          |
| GO:0048675 | 0.333 | 0.0294 | NA                                            | Long distance growth of a single process.                                                                                                                                                                                                                                                                                                                                                                                                                                                      |
| GO:0035017 | 0.333 | 0.0299 | NA                                            | The regionalization process that gives rise to the patterns of cell differentiation in the cuticle.                                                                                                                                                                                                                                                                                                                                                                                            |
| GO:0050832 | 0.308 | 0.0303 | NA                                            | Reactions triggered in response to the presence of a fungus that act to protect the cell or organism.                                                                                                                                                                                                                                                                                                                                                                                          |
| GO:0006417 | 0.333 | 0.0319 | regulation of translation                     | Any process that modulates the frequency, rate or extent of the chemical reactions and pathways resulting in the formation of proteins by the translation of mRNA.                                                                                                                                                                                                                                                                                                                             |
| GO:0042048 | 0.273 | 0.0323 | NA                                            | The actions or reactions of an organism in response to an odor.                                                                                                                                                                                                                                                                                                                                                                                                                                |

|            |       |        |                                 |                                                                                                                                                                                                                                                                                                                                                                                              |
|------------|-------|--------|---------------------------------|----------------------------------------------------------------------------------------------------------------------------------------------------------------------------------------------------------------------------------------------------------------------------------------------------------------------------------------------------------------------------------------------|
| GO:0051017 | 0.333 | 0.0327 | NA                              | The assembly of actin filament bundles; actin filaments are on the same axis but may be oriented with the same or opposite polarities and may be packed with different levels of tightness.                                                                                                                                                                                                  |
| GO:0030154 | 0.333 | 0.0329 | cell differentiation            | The process whereby relatively unspecialized cells, e.g. embryonic or regenerative cells, acquire specialized structural and/or functional features that characterize the cells, tissues, or organs of the mature organism or some other relatively stable phase of the organism's life history. Differentiation includes the processes involved in commitment of a cell to a specific fate. |
| GO:0046667 | 0.333 | 0.0391 | NA                              | Programmed cell death that occurs in the retina to remove excess cells between ommatidia, thus resulting in a hexagonal lattice, precise with respect to cell number and position surrounding each ommatidium.                                                                                                                                                                               |
| GO:0045087 | 0.261 | 0.0402 | NA                              | Innate immune responses are defense responses mediated by germline encoded components that directly recognize components of potential pathogens.                                                                                                                                                                                                                                             |
| GO:0009408 | 0.237 | 0.0414 | NA                              | A change in state or activity of a cell or an organism (in terms of movement, secretion, enzyme production, gene expression, etc.) as a result of a heat stimulus, a temperature stimulus above the optimal temperature for that organism.                                                                                                                                                   |
| GO:0007076 | 0.286 | 0.0417 | mitotic chromosome condensation | The cell cycle process whereby chromatin structure is compacted prior to and during mitosis in eukaryotic cells.                                                                                                                                                                                                                                                                             |
| GO:0007628 | 0.333 | 0.0419 | adult walking behavior          | The actions or reactions of an adult relating to the progression of that organism along the ground by the process of lifting and setting down each leg.                                                                                                                                                                                                                                      |
| GO:0016081 | 0.286 | 0.0424 | NA                              | The initial attachment of a synaptic vesicle membrane to the presynaptic membrane, mediated by proteins protruding from the membrane of the synaptic vesicle and the target membrane.                                                                                                                                                                                                        |



|            |       |        |                                      |                                                                                                                                                                                                                                                                                                                                                                                                                                                                                                                                                                                                             |
|------------|-------|--------|--------------------------------------|-------------------------------------------------------------------------------------------------------------------------------------------------------------------------------------------------------------------------------------------------------------------------------------------------------------------------------------------------------------------------------------------------------------------------------------------------------------------------------------------------------------------------------------------------------------------------------------------------------------|
| GO:0035172 | 0.333 | 0.0427 | NA                                   | The multiplication or reproduction of hemocytes, resulting in the expansion of the cell population. Hemocytes are blood cells associated with a hemocoel (the cavity containing most of the major organs of the arthropod body) which are involved in defense and clotting of hemolymph, but not involved in transport of oxygen.                                                                                                                                                                                                                                                                           |
| GO:0006281 | 0.250 | 0.043  | DNA repair                           | The process of restoring DNA after damage. Genomes are subject to damage by chemical and physical agents in the environment (e.g. UV and ionizing radiations, chemical mutagens, fungal and bacterial toxins, etc.) and by free radicals or alkylating agents endogenously generated in metabolism. DNA is also damaged because of errors during its replication. A variety of different DNA repair pathways have been reported that include direct reversal, base excision repair, nucleotide excision repair, photoreactivation, bypass, double-strand break repair pathway, and mismatch repair pathway. |
| GO:0000070 | 0.286 | 0.0431 | mitotic sister chromatid segregation | The cell cycle process whereby replicated homologous chromosomes are organized and then physically separated and apportioned to two sets during the mitotic cell cycle. Each replicated chromosome, composed of two sister chromatids, aligns at the cell equator, paired with its homologous partner. One homolog of each morphologic type goes into each of the resulting chromosome sets.                                                                                                                                                                                                                |
| GO:0007020 | 0.333 | 0.0434 | microtubule nucleation               | The 'de novo' formation of a microtubule, in which tubulin heterodimers form metastable oligomeric aggregates, some of which go on to support formation of a complete microtubule. Microtubule nucleation usually occurs from a specific site within a cell.                                                                                                                                                                                                                                                                                                                                                |
| GO:0016334 | 0.333 | 0.0434 | NA                                   | Any cellular process that results in the specification, formation or maintenance of a polarized follicular epithelial sheet.                                                                                                                                                                                                                                                                                                                                                                                                                                                                                |

Genomic Polymorphism and Divergence

|            |       |        |                            |                                                                                                                                                                                                                                                      |
|------------|-------|--------|----------------------------|------------------------------------------------------------------------------------------------------------------------------------------------------------------------------------------------------------------------------------------------------|
| GO:0035160 | 0.333 | 0.0435 | NA                         | Ensuring that tracheal tubes in an open tracheal system maintain their epithelial structure during the cell shape changes and movements that occur during the branching process.                                                                     |
| GO:0019731 | 0.286 | 0.0438 | NA                         | An immune response against bacteria mediated through a body fluid. Examples of this process are the antibacterial humoral responses in <i>Mus musculus</i> and <i>Drosophila melanogaster</i> .                                                      |
| GO:0006302 | 0.333 | 0.0443 | double-strand break repair | The repair of double-strand breaks in DNA via homologous and nonhomologous mechanisms to reform a continuous DNA helix.                                                                                                                              |
| GO:0007617 | 0.333 | 0.0449 | mating behavior            | The behavioral interactions between organisms for the purpose of mating, or sexual reproduction resulting in the formation of zygotes.                                                                                                               |
| GO:0006825 | 0.333 | 0.045  | copper ion transport       | The directed movement of copper (Cu) ions into, out of, within or between cells by means of some external agent such as a transporter or pore.                                                                                                       |
| GO:0016339 | 0.300 | 0.0456 | NA                         | The attachment of one cell to another cell via adhesion molecules that require the presence of calcium for the interaction.                                                                                                                          |
| GO:0007160 | 0.333 | 0.046  | cell-matrix adhesion       | The binding of a cell to the extracellular matrix via adhesion molecules.                                                                                                                                                                            |
| GO:0015914 | 0.333 | 0.0466 | NA                         | The directed movement of phospholipids into, out of, within or between cells by means of some external agent such as a transporter or pore. Phospholipids are any lipids containing phosphoric acid as a mono- or diester.                           |
| GO:0035277 | 0.300 | 0.0467 | NA                         | The process by which the anatomical structures of a spiracle are generated and organized. Spiracles are the openings in the insect open tracheal system; externally they connect to the epidermis and internally they connect to the tracheal trunk. |

*Genomic Polymorphism and Divergence*

|            |       |        |                                       |                                                                                                                                                                                                                                                                                                                                                                                                          |
|------------|-------|--------|---------------------------------------|----------------------------------------------------------------------------------------------------------------------------------------------------------------------------------------------------------------------------------------------------------------------------------------------------------------------------------------------------------------------------------------------------------|
| GO:0008535 | 0.333 | 0.0468 | respiratory chain complex IV assembly | The aggregation, arrangement and bonding together of a set of components to form respiratory chain complex IV (also known as cytochrome c oxidase), the terminal member of the respiratory chain of the mitochondrion and some aerobic bacteria. Cytochrome c oxidases are multi-subunit enzymes containing from 13 subunits in the mammalian mitochondrial form to 3-4 subunits in the bacterial forms. |
| GO:0035220 | 0.300 | 0.0478 | NA                                    | Progression of the wing disc over time, from its initial formation through to its metamorphosis to form adult structures including the wing hinge, wing blade and pleura.                                                                                                                                                                                                                                |
| GO:0007528 | 0.300 | 0.0479 | neuromuscular junction development    | The process whose specific outcome is the progression of the neuromuscular junction over time, from its formation to the mature structure.                                                                                                                                                                                                                                                               |
| GO:0007494 | 0.263 | 0.0497 | midgut development                    | The process whose specific outcome is the progression of the midgut over time, from its formation to the mature structure. The midgut is the middle part of the alimentary canal from the stomach, or entrance of the bile duct, to, or including, the large intestine.                                                                                                                                  |

Table S17

Amino acid replacement  $F_{ST}$  GO enrichment analysis – *cellular* categories.

| GO         | proportion significant genes | p-values | GOslim description                      | GO description                                                                                                                                                                                                                                                                                                                                            |
|------------|------------------------------|----------|-----------------------------------------|-----------------------------------------------------------------------------------------------------------------------------------------------------------------------------------------------------------------------------------------------------------------------------------------------------------------------------------------------------------|
| GO:0000796 | 0.571                        | 0.001    | condensin complex                       | A multisubunit protein complex that plays a central role in chromosome condensation.                                                                                                                                                                                                                                                                      |
| GO:0008076 | 0.400                        | 0.0088   | voltage-gated potassium channel complex | A protein complex that forms a transmembrane channel through which potassium ions may cross a cell membrane in response to changes in membrane potential.                                                                                                                                                                                                 |
| GO:0016222 | 0.400                        | 0.0258   | NA                                      | A protein complex that catalyzes the formation of procollagen trans-4-hydroxy-L-proline and succinate from procollagen L-proline and 2-oxoglutarate, requiring Fe <sup>2+</sup> and ascorbate. Contains two alpha subunits that contribute to most parts of the catalytic sites, and two beta subunits that are identical to protein-disulfide isomerase. |
| GO:0005682 | 0.400                        | 0.0266   | U5 snRNP                                | A ribonucleoprotein complex that contains small nuclear RNA U5.                                                                                                                                                                                                                                                                                           |
| GO:0016327 | 0.400                        | 0.0266   | NA                                      | The apical end of the lateral plasma membrane of epithelial cells.                                                                                                                                                                                                                                                                                        |
| GO:0005694 | 0.308                        | 0.0305   | chromosome                              | A structure composed of a very long molecule of DNA and associated proteins (e.g. histones) that carries hereditary information.                                                                                                                                                                                                                          |
| GO:0005654 | 0.308                        | 0.0332   | nucleoplasm                             | That part of the nuclear content other than the chromosomes or the nucleolus.                                                                                                                                                                                                                                                                             |
| GO:0005643 | 0.261                        | 0.039    | nuclear pore                            | Any of the numerous similar discrete openings in the nuclear envelope of a eukaryotic cell, where the inner and outer nuclear membranes are joined.                                                                                                                                                                                                       |
| GO:0019898 | 0.300                        | 0.0451   | NA                                      | Loosely bound to one surface of a membrane, but not integrated into the hydrophobic region.                                                                                                                                                                                                                                                               |

Table S18

Amino acid replacement  $F_{ST}$  GO enrichment analysis – *molecular* categories.

| GO         | proportion significant genes | p-values | GOslim description                           | GO description                                                                                                                                                                                                                                                                                                                                                                                                                         |
|------------|------------------------------|----------|----------------------------------------------|----------------------------------------------------------------------------------------------------------------------------------------------------------------------------------------------------------------------------------------------------------------------------------------------------------------------------------------------------------------------------------------------------------------------------------------|
| GO:0004656 | 0.556                        | 0.0005   | procollagen-proline 4-dioxygenase activity   | Catalysis of the reaction: procollagen L-proline + 2-oxoglutarate + O <sub>2</sub> = procollagen trans-4-hydroxy-L-proline + succinate + CO <sub>2</sub> . Interacting selectively and non-covalently with L-ascorbic acid, (2R)-2-[(1S)-1,2-dihydroxyethyl]-4-hydroxy-5-oxo-2,5-dihydrofuran-3-olate; L-ascorbic acid is vitamin C and has co-factor and anti-oxidant activities in many species.                                     |
| GO:0031418 | 0.455                        | 0.002    | NA                                           |                                                                                                                                                                                                                                                                                                                                                                                                                                        |
| GO:0005506 | 0.290                        | 0.010    | iron ion binding                             | Interacting selectively and non-covalently with iron (Fe) ions.                                                                                                                                                                                                                                                                                                                                                                        |
| GO:0008527 | 0.333                        | 0.010    | taste receptor activity                      | Combining with soluble compounds to initiate a change in cell activity. These receptors are responsible for the sense of taste.                                                                                                                                                                                                                                                                                                        |
| GO:0008026 | 0.400                        | 0.010    | ATP-dependent helicase activity              | Catalysis of the reaction: ATP + H <sub>2</sub> O = ADP + phosphate to drive the unwinding of a DNA or RNA helix.                                                                                                                                                                                                                                                                                                                      |
| GO:0005544 | 0.429                        | 0.011    | calcium-dependent phospholipid binding       | Interacting selectively and non-covalently with phospholipids, a class of lipids containing phosphoric acid as a mono- or diester, in the presence of calcium.                                                                                                                                                                                                                                                                         |
| GO:0050839 | 0.429                        | 0.011    | NA                                           | Interacting selectively and non-covalently with a cell adhesion molecule.                                                                                                                                                                                                                                                                                                                                                              |
| GO:0016702 | 0.429                        | 0.012    | NA                                           | Catalysis of an oxidation-reduction (redox) reaction in which hydrogen or electrons are transferred from one donor, and two oxygen atoms is incorporated into a donor.                                                                                                                                                                                                                                                                 |
| GO:0003724 | 0.375                        | 0.019    | RNA helicase activity                        | Catalysis of the reaction: NTP + H <sub>2</sub> O = NDP + phosphate to drive the unwinding of a RNA helix.                                                                                                                                                                                                                                                                                                                             |
| GO:0003824 | 0.224                        | 0.019    | catalytic activity                           | Catalysis of a biochemical reaction at physiological temperatures. In biologically catalyzed reactions, the reactants are known as substrates, and the catalysts are naturally occurring macromolecular substances known as enzymes. Enzymes possess specific binding sites for substrates, and are usually composed wholly or largely of protein, but RNA that has catalytic activity (ribozyme) is often also regarded as enzymatic. |
| GO:0008528 | 0.400                        | 0.022    | peptide receptor activity, G-protein coupled | Combining with an extracellular or intracellular peptide to initiate a G-protein mediated change in cell activity. A G-protein is a signal transduction molecule that alternates between an inactive GDP-bound and an active GTP-bound state.                                                                                                                                                                                          |
| GO:0004012 | 0.400                        | 0.025    | phospholipid-translocating ATPase activity   | Catalysis of the movement of phospholipids from one membrane face to the other (phospholipid 'flippase' activity), driven by the hydrolysis of ATP.                                                                                                                                                                                                                                                                                    |

## Genomic Polymorphism and Divergence

|            |       |                                                         |                                                                                                                                                                                                                                                                                                          |
|------------|-------|---------------------------------------------------------|----------------------------------------------------------------------------------------------------------------------------------------------------------------------------------------------------------------------------------------------------------------------------------------------------------|
| GO:0046030 | 0.400 | 0.025NA                                                 | Catalysis of the removal of one of the three phosphate groups of an inositol trisphosphate.                                                                                                                                                                                                              |
| GO:0004000 | 0.400 | 0.025adenosine deaminase activity                       | Catalysis of the reaction: adenosine + H <sub>2</sub> O = inosine + NH <sub>3</sub> .                                                                                                                                                                                                                    |
| GO:0004165 | 0.400 | 0.025dodecenoyl-CoA delta-isomerase activity            | Catalysis of the reaction: 3-cis-dodecenoyl-CoA = 2-trans-dodecenoyl-CoA.                                                                                                                                                                                                                                |
| GO:0004370 | 0.400 | 0.025glycerol kinase activity                           | Catalysis of the reaction: ATP + glycerol = ADP + glycerol 3-phosphate.                                                                                                                                                                                                                                  |
| GO:0016757 | 0.400 | 0.025NA                                                 | Catalysis of the transfer of a glycosyl group from one compound (donor) to another (acceptor).                                                                                                                                                                                                           |
|            |       |                                                         | Catalysis of the template-independent extension of the 3'- end of an RNA or DNA strand by addition of one adenosine molecule at a time. Cannot initiate a chain 'de novo'. The primer, depending on the source of the enzyme, may be an RNA or DNA fragment, or oligo(A) bearing a 3'-OH terminal group. |
| GO:0004652 | 0.400 | 0.026polynucleotide adenyltransferase activity          |                                                                                                                                                                                                                                                                                                          |
| GO:0008188 | 0.267 | 0.027neuropeptide receptor activity                     | Combining with a neuropeptide to initiate a change in cell activity.                                                                                                                                                                                                                                     |
|            |       | RNA polymerase II transcription factor activity,        | Functions to initiate or regulate RNA polymerase II transcription by binding an enhancer region of DNA.                                                                                                                                                                                                  |
| GO:0003705 | 0.400 | 0.027enhancer binding                                   |                                                                                                                                                                                                                                                                                                          |
| GO:0004386 | 0.258 | 0.027helicase activity                                  | Catalysis of the reaction: NTP + H <sub>2</sub> O = NDP + phosphate to drive the unwinding of a DNA or RNA helix.                                                                                                                                                                                        |
| GO:0004872 | 0.286 | 0.028receptor activity                                  | Combining with an extracellular or intracellular messenger to initiate a change in cell activity.                                                                                                                                                                                                        |
|            |       |                                                         | The formation of a protein dimer, a macromolecular structure consists of two noncovalently associated identical or nonidentical subunits.                                                                                                                                                                |
| GO:0046983 | 0.273 | 0.033NA                                                 |                                                                                                                                                                                                                                                                                                          |
| GO:0004004 | 0.273 | 0.036ATP-dependent RNA helicase activity                | Catalysis of the reaction: ATP + H <sub>2</sub> O = ADP + phosphate, driving the unwinding of an RNA helix.                                                                                                                                                                                              |
|            |       |                                                         | Catalysis of the transmembrane transfer of an ion by a channel that opens when extracellular glutamate has been bound by the channel complex or one of its constituent parts.                                                                                                                            |
| GO:0005234 | 0.278 | 0.039extracellular-glutamate-gated ion channel activity | Combining with glutamate to initiate a change in cell activity through the regulation of ion channels.                                                                                                                                                                                                   |
| GO:0004970 | 0.286 | 0.042ionotropic glutamate receptor activity             | Interacting selectively and non-covalently with the epidermal growth factor receptor.                                                                                                                                                                                                                    |
| GO:0005154 | 0.333 | 0.043epidermal growth factor receptor binding           |                                                                                                                                                                                                                                                                                                          |
| GO:0004016 | 0.333 | 0.044adenylate cyclase activity                         | Catalysis of the reaction: ATP = 3',5'-cyclic AMP + diphosphate.                                                                                                                                                                                                                                         |
| GO:0005249 | 0.300 | 0.045voltage-gated potassium channel activity           | Catalysis of the transmembrane transfer of a potassium ion by a voltage-gated channel.                                                                                                                                                                                                                   |
|            |       |                                                         | Interacting selectively and non-covalently with an actin filament, also known as F-actin, a helical filamentous polymer of globular G-actin subunits.                                                                                                                                                    |
| GO:0051015 | 0.333 | 0.045NA                                                 |                                                                                                                                                                                                                                                                                                          |
| GO:0046982 | 0.263 | 0.047NA                                                 | Interacting selectively and non-covalently with a nonidentical protein to form a heterodimer.                                                                                                                                                                                                            |

**Table S19.**

MW HKA valleys (2.5% lowest quantile, merged if within 10 kbp), and position relative to nearest gene. Regions analyzed: 2L:659000-15653000, 2R:6508000-19932000, 3L:411000-14556000, 3R:12601000-27224000, X:3701000-19185000.

**Table S20.**

Gene ontology analysis of MW HKA low outliers

**Table S21.**

MW HKA peaks (2.5% highest quantile, merged if within 10 kbp), and position relative to nearest gene. Regions analyzed: 2L:659000-15653000, 2R:6508000-19932000, 3L:411000-14556000, 3R:12601000-27224000, X:3701000-19185000.

**Table S22.**

Diversity ratio valleys (see text) shared between MW *D. melanogaster* and the *D. simulans* data of Begun et al. (2007). Regions analyzed: 2L:3047000-15560000, 2R:6508000-19002000, 3L:3339000-14556000, 3R:12909000-26707000, X:3701000-18963000

**Table S23.**

Gene ontology analysis of MW HKA high outliers.

**Table S24.**

Diversity ratio valleys (2.5% lowest quantile, merged if within 10 kbp), and position relative to nearest gene. Regions analyzed: 2L:705000-15560000, 2R:6508000-19680000, 3L:411000-14556000, 3R:12909000-27218000, X:3701000-19185000.

**Table S25.**

Gene ontology analysis of heterozygosity ratio outliers.

**Table S26.**

Diversity valleys (see text) shared between MW *D. melanogaster* and the *D. simulans* data of Begun et al. (2007). Regions analyzed: 2L:3047000-15560000, 2R:6508000-19002000, 3L:3339000-14556000, 3R:12909000-26707000, X:3701000-18963000.
