# Supplementary material
Source: PubMed Central journal article supplement (PMC3454882)
Supplement: supp_112.142018_FigureS4.pdf [file supp_112.142018_FigureS4.pdf]

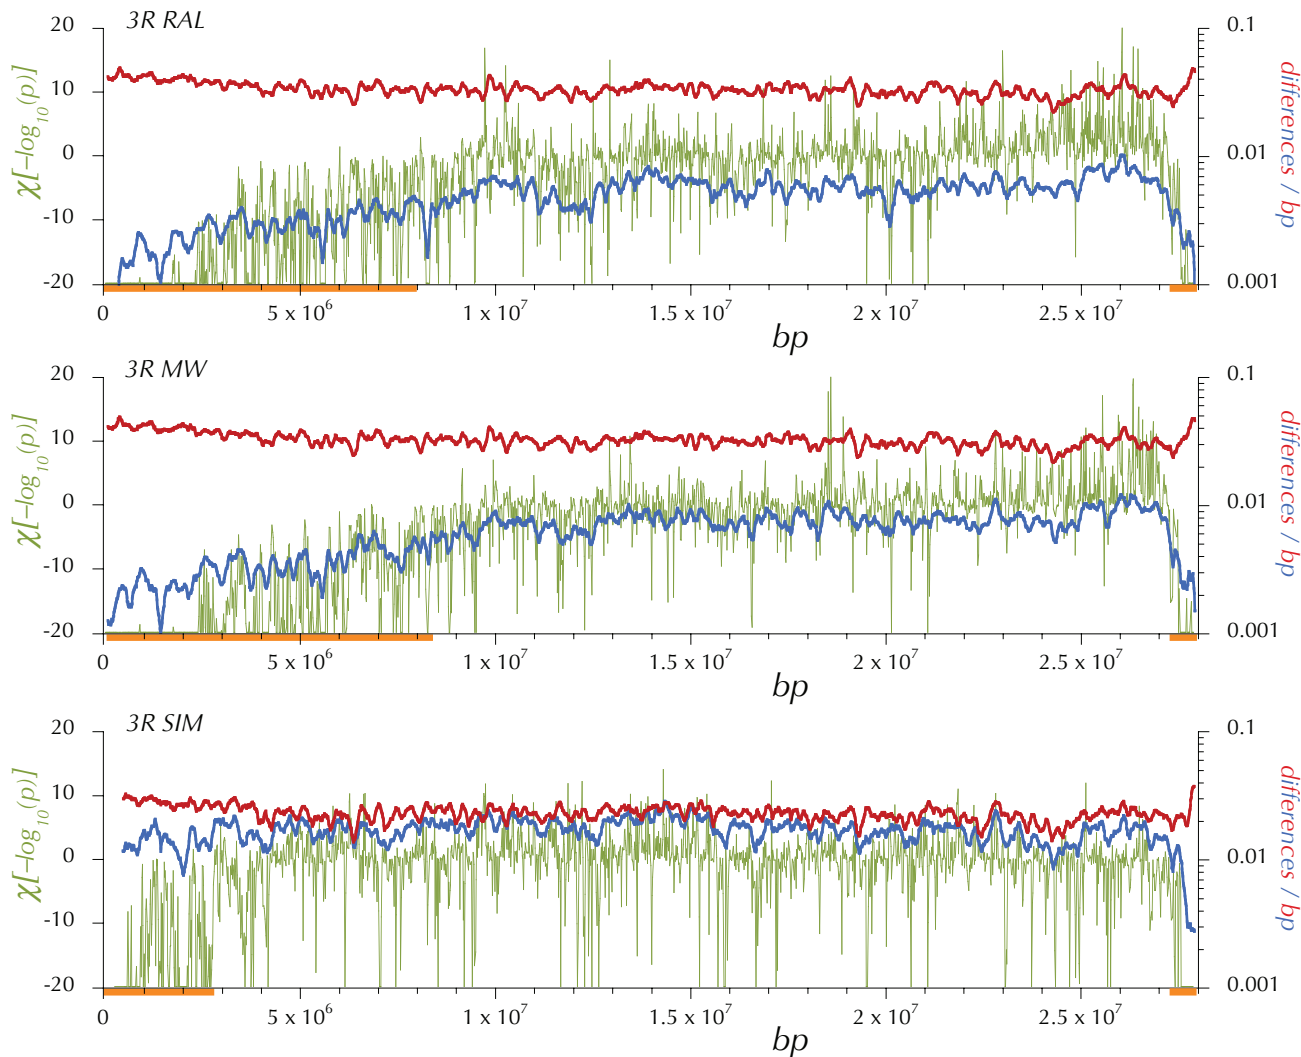

**Figure S4.** — Expected heterozygosity, divergence and  $HKAI$  on the chr3R for the North American (RAL), African (MW) and simulans (SIM) samples. The (blue) expected heterozygosity,  $\pi$  at the midpoint of 150 kbp windows (incremented every 10 kbp, minimum coverage = 0.25 and Q30 sequence). The (red) lineage specific, average Q30 divergence in 150 kbp windows (incremented every 10 kbp and minimum coverage of 0.25). A preliminary application of  $HKAI$  on the Q30 data in windows of 4096 contiguous polymorphic or divergent sites identified centromere- and telomere-proximal regions (orange bars) in which the each window exhibited a deficiency of polymorphic sites relative to the chromosome-arm average. Then  $HKAI$  was applied again on the Q30 data in windows of 512 contiguous polymorphic or divergent sites (excluding these centromere- and telomere-proximal regions from calculation of the chromosome-arm-wide expected proportions,  $p_e$  and  $d_e$ ). The (olive)  $\chi[\log(p_{HKAI})]$  is the log of the p-value associated with  $HKAI$  plotted with the sign of the difference between the observed number and the expected number of polymorphic sites in the window.
