# Supplementary material
Source: PubMed Central journal article supplement (PMC3454882)
Supplement: supp_112.142018_FigureS8.pdf [file supp_112.142018_FigureS8.pdf]

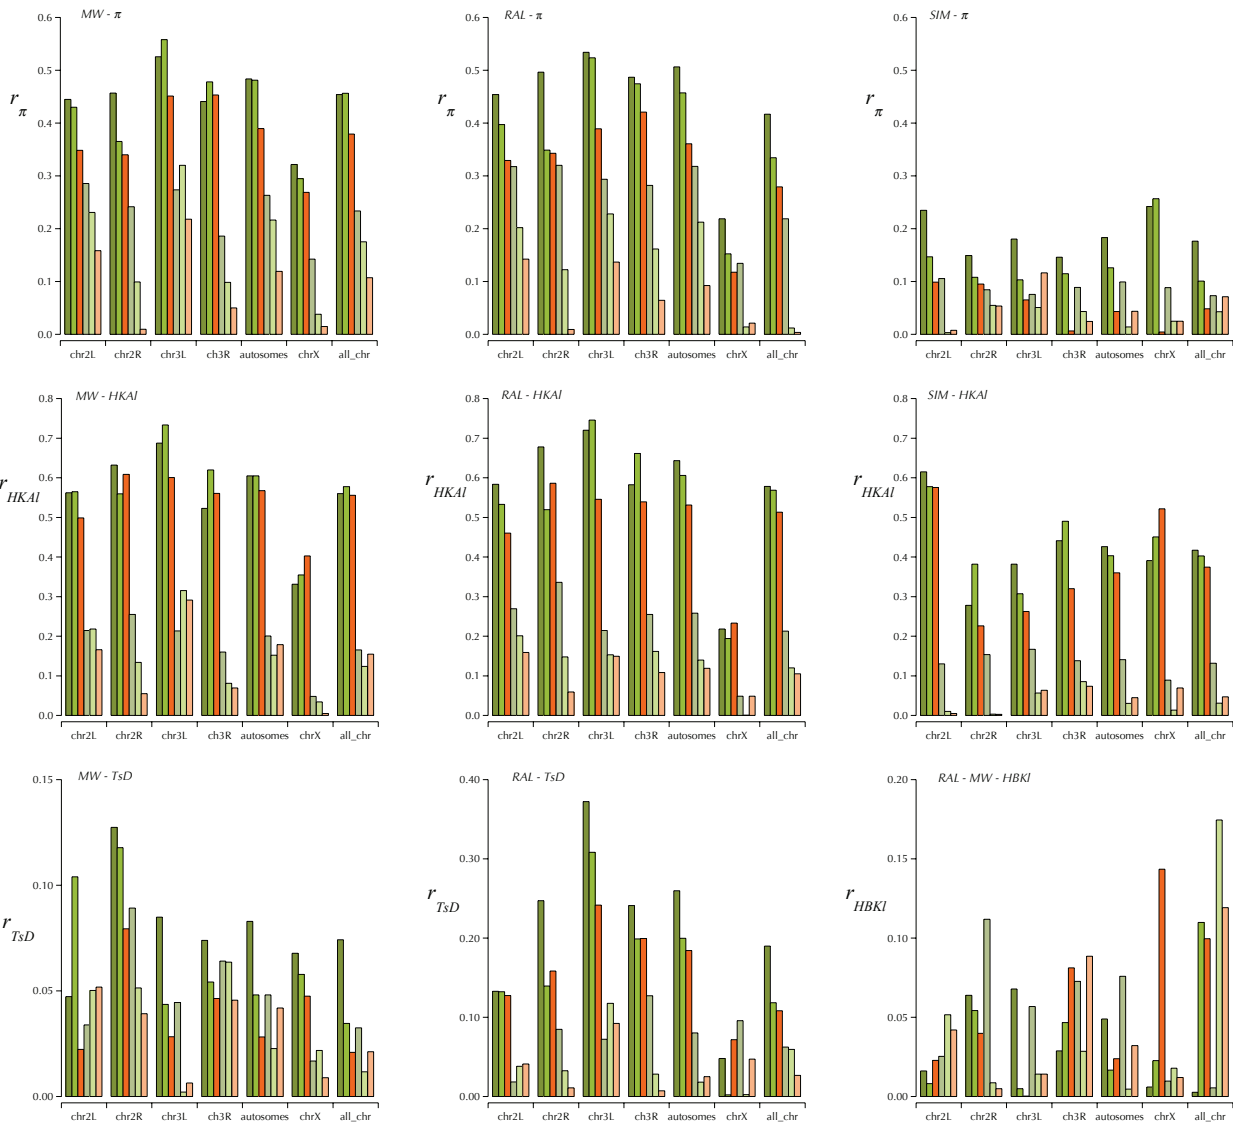

**Figure S8.** — Correlations between recombination rates and  $HKAI$ ,  $\pi_w$  &  $TsD$ .  $r$  is the bp-weighted Pearson's correlation coefficient between  $TsD$ ,  $\pi_w$  &  $HKAI$  and the logarithms of  $\hat{\rho}_0$  (olive),  $\hat{\rho}_{15}$  (light olive) and  $\hat{\rho}_{15}$  (orange) across the autosomes and X chromosome. The three lower columns to the right (lighter shades) are the corresponding correlations for the “trimmed” euchromatic regions.
