# Supplementary material
Source: PubMed Central journal article supplement (PMC3454882)
Supplement: supp_112.142018_TableS10.pdf [file supp_112.142018_TableS10.pdf]

**Table S10.**

**Average sampling depth of coding regions on the X and on the autosomes.**

|     | MW   |           | RAL   |           |
|-----|------|-----------|-------|-----------|
|     | X    | autosomes | X     | autosomes |
| Q30 | 6.66 | 5.19      | 31.61 | 32.05     |
| Q40 | 5.81 | 4.55      | 24.95 | 28.15     |
